# Supplementary material for: A Keplerian Ag90 nest of Platonic and Archimedean polyhedra in different symmetry groups
Source: PubMed Central journal article supplement (PMC7335041; doi:10.1038/s41467-020-17198-1), 2020-07-03
Supplement: 41467_2020_17198_MOESM1_ESM.pdf [file 41467_2020_17198_MOESM1_ESM.pdf]

# **Supplementary Information**

## **A Keplerian $Ag_{90}$ Nest of Platonic and Archimedean Polyhedra in Different Symmetry Groups**

**Su et al**

## **Supplementary Methods.**

### **Materials and reagents**

Solvents and reagents (Adamas-Beta®) were purchased from Shanghai Titan Scientific Co., Ltd. Unless otherwise noted, all of the chemicals were reagent grade and used without any further purification. The precursor, [tBuSAg]<sub>n</sub>, was prepared according to the literature.<sup>1</sup> The solution of AgNO<sub>3</sub> (30 mmol, 5.1 g) in 75 mL acetonitrile was mixed with 100 mL ethanol containing tBuSH (30 mmol, 3.38 mL) and 5 mL Et<sub>3</sub>N under stirring for 3 h in the dark at room temperature, then the white powder of [tBuSAg]<sub>n</sub> was isolated by vacuum filtration and washed with 10 mL ethanol and 20 mL ether, then dried in the ambient environment (yield: 95 %, based on AgNO<sub>3</sub>).

### **Fourier transform infrared spectroscopy (FTIR)**

The IR-ATR spectrum was recorded on a PerkinElmer Spectrum Two in the frequency range of 4000–400 cm<sup>-1</sup>.

### **Elemental analysis**

The elemental analyses (C and H) were determined on a Vario EL III analyzer.

### **UV/Vis spectroscopy**

UV-Vis diffuse reflectance spectra (DRS) were recorded on a Thermo Scientific Evolution 220 UV-visible spectrophotometer equipped with a 60 mm integrating sphere and SPECTRALON® was used as the reference.

### **Nuclear magnetic resonance (NMR)**

The <sup>31</sup>P NMR spectrum was recorded in a J. Young NMR tube on Bruker Avance 500 spectrometer. (In general, crystals of **SD/Ag90a** were dissolved in DMSO and digested with excessive 37% HCl. The digestion solution was used directly for <sup>31</sup>P NMR measurement.) The chemical shifts are reported in parts per million δ (ppm).

### **Thermogravimetric analysis (TGA)**

Thermogravimetric analysis (TGA) was done in a TA SDT Q600 thermal analyzer at a heating rate of 20 °C min<sup>-1</sup> under N<sub>2</sub> atmosphere (200 mL min<sup>-1</sup>) from 20 to 800 °C.

### **Photoluminescence spectroscopy**

Temperature-dependent photoluminescence measurements were carried out in an

Edinburgh spectrofluorimeter (FLS920) coupled with an Optistat DN cryostat (Oxford Instruments). The ITC temperature controller and a pressure gauge were used to realize the variable-temperature measurement in the range of 293-93 K. Spectra were collected at different temperatures after a 2-minute homeothermy.

### **Photoluminescence lifetime**

Time-resolved photoluminescence lifetime was measured on an Edinburgh spectrofluorimeter (FLS920) with a time-correlated single-photon counting technique.

### **Photocurrent measurement**

The photocurrent test was carried out on a CHI660E electrochemistry workstation. The 5 mg samples ( $[\text{tBuSAg}]_n$  or **SD/Ag90a**) and naphthol (0.5 wt. %, 10  $\mu\text{L}$ ) were dispersed in 0.5 mL ethanol, and the mixture was sonicated for about 30 min. Then a 100  $\mu\text{L}$  solution was transferred by pipet dropped on the cleaned ITO glass, and the coated film was obtained after evaporation under ambient atmosphere. The prepared ITO glass film was used as working electrode, a Pt wire as the counter electrode, and an Ag/AgCl electrode as the reference electrode. A  $\text{Na}_2\text{SO}_4$  aqueous solution (0.2 M) was used as the medium.

### Supplementary Note.

Single crystals of **SD/Ag90a** and **SD/Ag90b** with appropriate dimensions were chosen under an optical microscope and quickly coated with high vacuum grease (Dow Corning Corporation) to prevent decomposition. Single-crystal X-ray diffraction data of **SD/Ag90a** and **SD/Ag90b** were collected on a Rigaku Oxford Diffraction XtaLAB Synergy diffractometer equipped with a HyPix-6000HE area detector at 100 K using Cu K $\alpha$  ( $\lambda = 1.54184 \text{ \AA}$ ) from a PhotonJet micro-focus X-ray Source. The diffraction images were processed and scaled using the *CrysAlis<sup>Pro</sup>* software suite.<sup>2</sup> Both structures were solved using the charge-flipping algorithm, as implemented in the program *SUPERFLIP*<sup>3</sup> and refined by the full-matrix least-squares techniques against  $F_o^2$  using the SHELXL program<sup>4</sup> through the OLEX2 interface.<sup>5</sup> Hydrogen atoms at carbon were placed in calculated positions and refined isotropically by using a riding model. Appropriate restraints and constraints were applied to the geometry and the atomic displacement parameters of the atoms in the cluster. All structures were examined using the Addsym subroutine of PLATON<sup>6</sup> to ensure that no additional symmetry could be applied to the models. Pertinent crystallographic data collection and refinement parameters are collated in Supplementary Table 1. Selected bond lengths and angles are collated in Supplementary Tables 2 and 3.

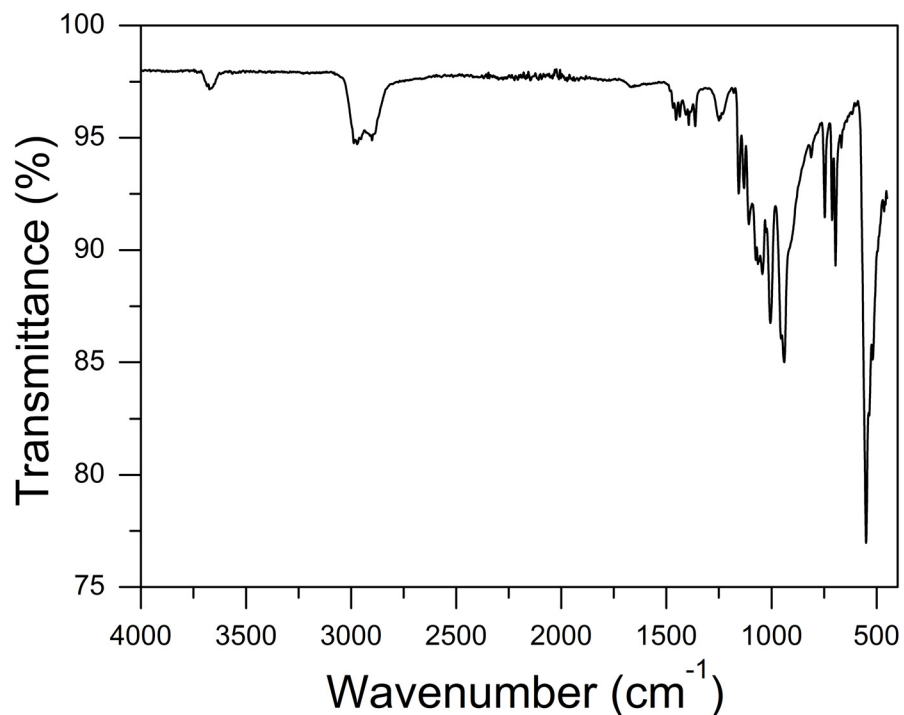

**Supplementary Figure 1:** IR spectrum of **SD/Ag90a**. Based on this spectrum, some peaks of characteristic groups were identified and assigned. The C-H stretching vibration peaks locate at *ca.* 2980 cm<sup>-1</sup>. The symmetric and anti-symmetric stretching vibration peaks for PO<sub>4</sub><sup>3-</sup> locate at 1007 and 1040 cm<sup>-1</sup>, respectively. The aromatic C-C stretching vibration for PhPO<sub>3</sub><sup>2-</sup> is observed at 1150 cm<sup>-1</sup>. The C-H out-of-plane bending vibration peaks for PhPO<sub>3</sub><sup>2-</sup> appeared at 689, 715, and 747 cm<sup>-1</sup> as sharp peaks.

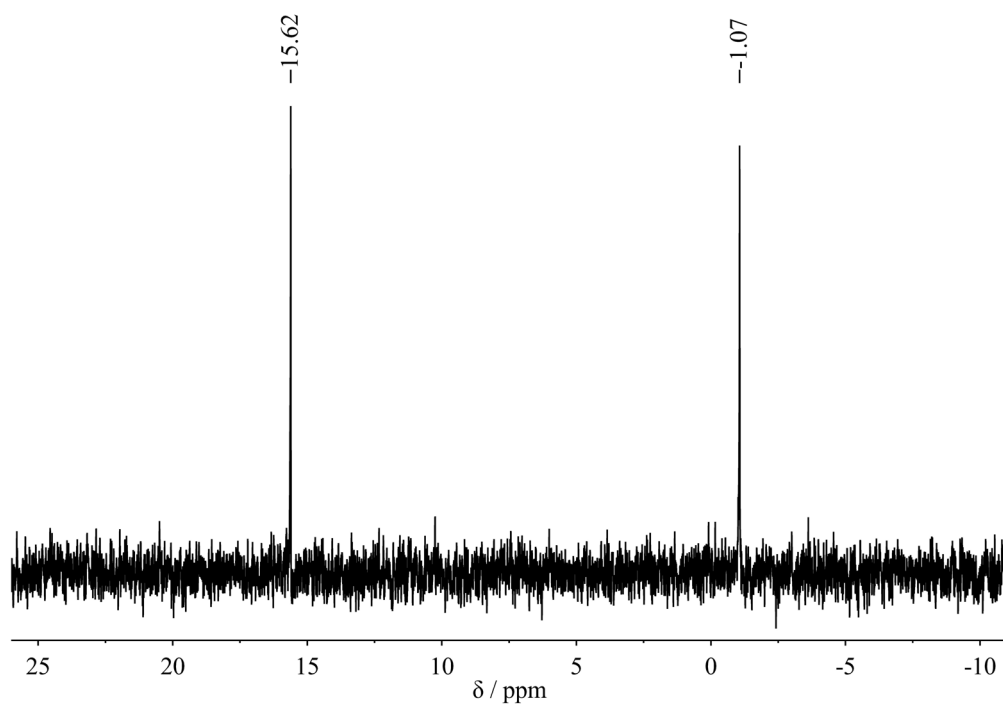

**Supplementary Figure 2:**  $^{31}\text{P}$  NMR of **SD/Ag90a**. Crystals of **SD/Ag90a** were dissolved in DMSO and then digested with excess HCl (37%). The  $^{31}\text{P}$  NMR of the digestion solution shows two sharp peaks with chemical shifts at  $\delta = -1.07$  and  $15.62$  ppm, corresponding to  $\text{H}_3\text{PO}_4$  and  $\text{PhPO}_3\text{H}_2$ , respectively, which clearly verify the existence of two different P-containing chemicals in **SD/Ag90a**.

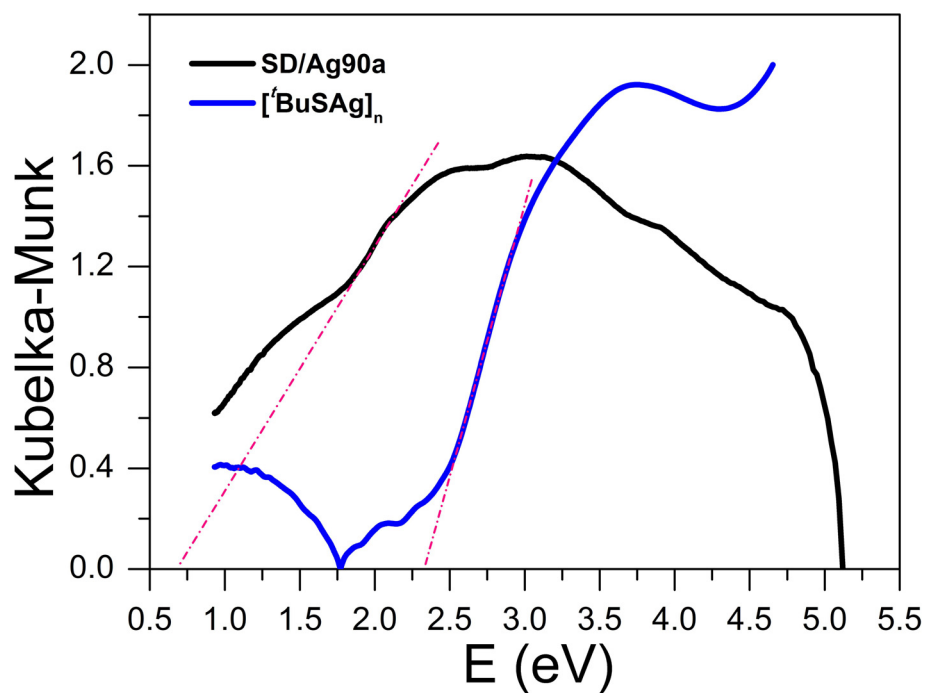

**Supplementary Figure 3:** Absorption spectra of **SD/Ag90a** and  $[t\text{BuSAg}]_n$  precursor derived from the diffuse reflectance spectra through the Kubelka–Munk function. The red dashed lines represent the extrapolation of the linear part of Kubelka–Munk function plots.

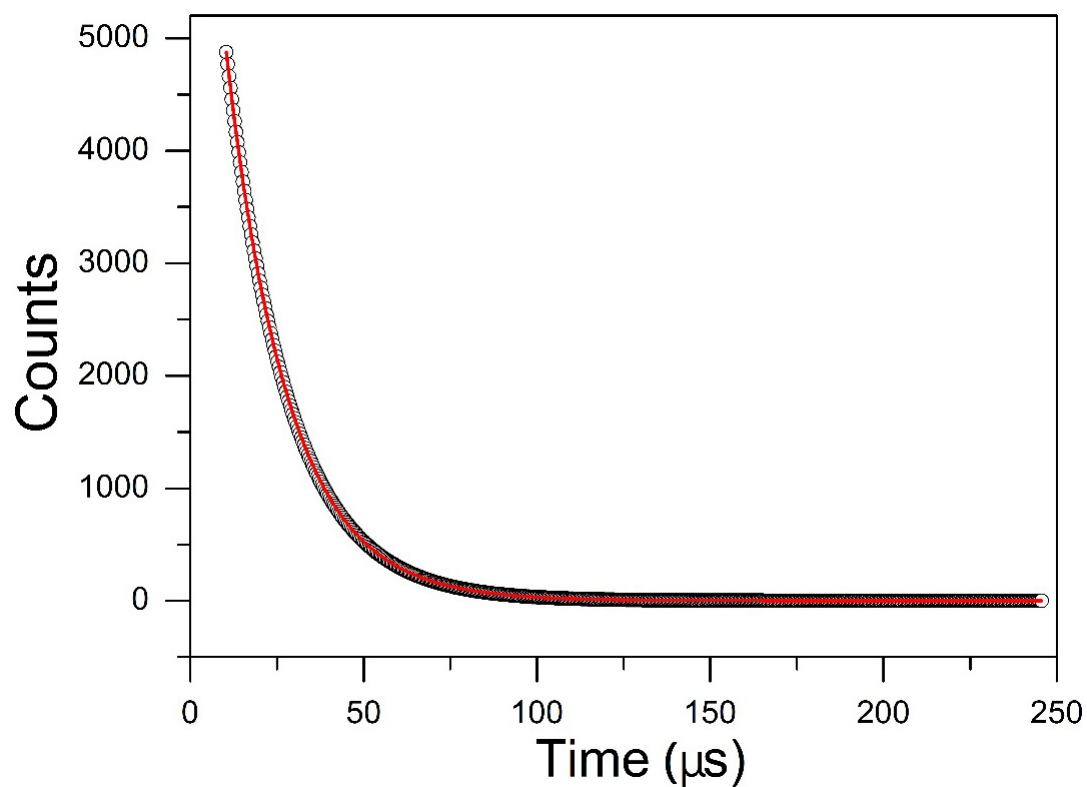

**Supplementary Figure 4:** The luminescence decay curve of **SD/Ag90a**. The emission lifetime of **SD/Ag90a**, falling in the microsecond scale  $\tau_{\text{SD/Ag90a}} = 17.80 \mu\text{s}$  at 93 K, suggests a triplet phosphorescence origin.



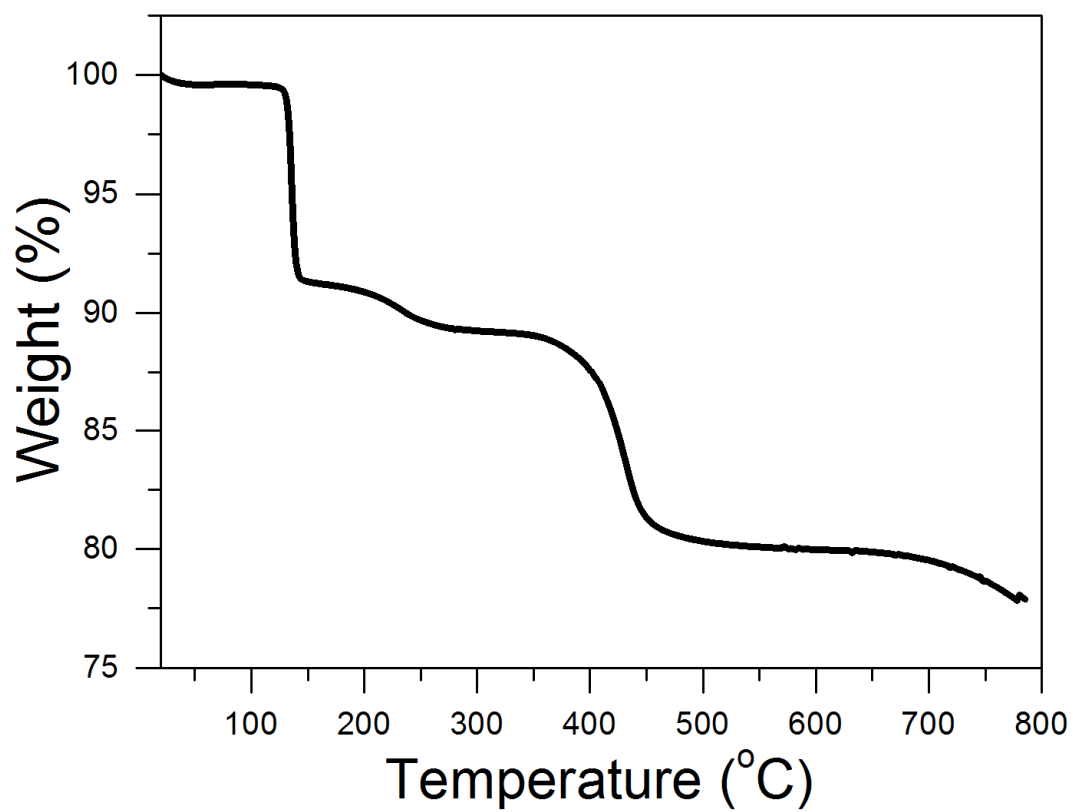

**Supplementary Figure 5:** The TGA (thermogravimetric analysis) for **SD/Ag90a**. This cluster can be stabilized to 125 °C; then, the ligands decompose upon further heating.

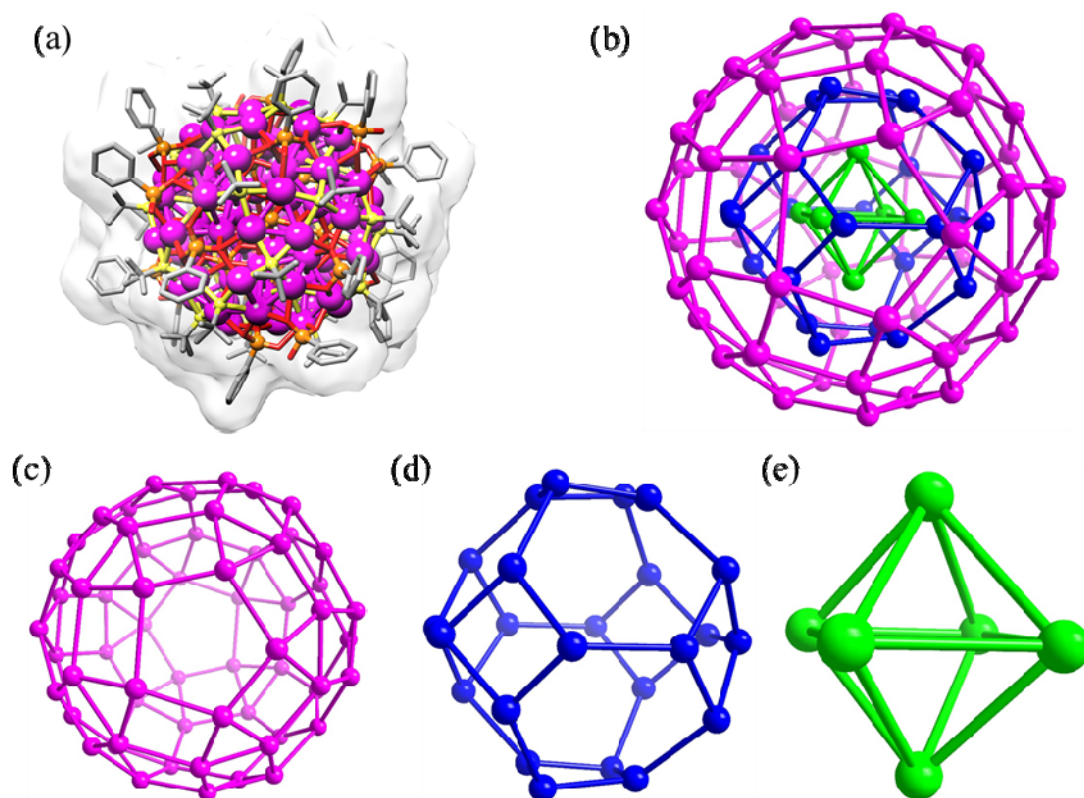

**Supplementary Figure 6:** The structural diagrams of **SD/Ag90b**. **(a)** Total cluster structure of **SD/Ag90b**. Hydrogen atoms are removed for clarity. Color legend: Ag, purple; P, brown; S, yellow; O, red; C, gray. **(b)** The ball-and-stick mode of the triply nested polyhedral silver skeleton viewed down the top silver pentagon. The different shells are individually colored. **(c)** The Ag<sub>60</sub> rhombicosidodecahedron. **(d)** The Ag<sub>24</sub> truncated octahedron. **(e)** The Ag<sub>6</sub> octahedron.

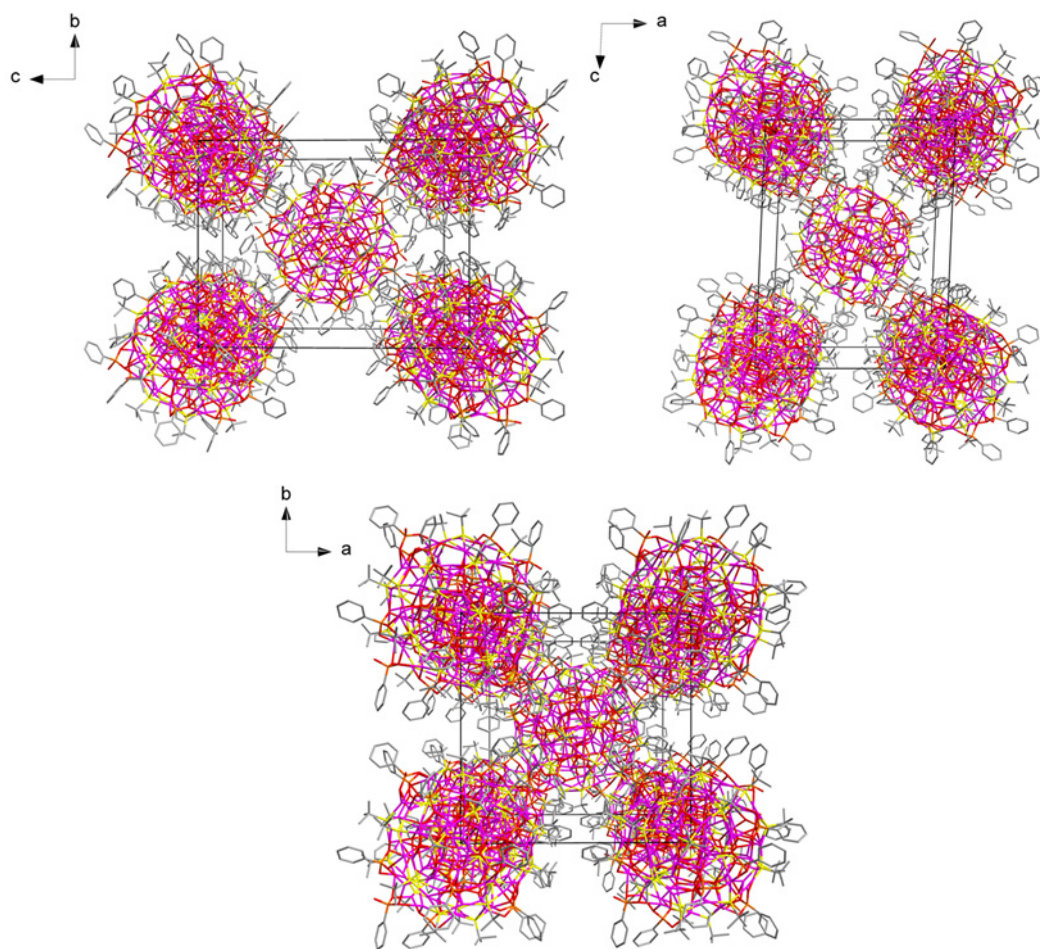

**Supplementary Figure 7:** Molecules packing in one unit cell for **SD/Ag90a** viewed along three different orientations.

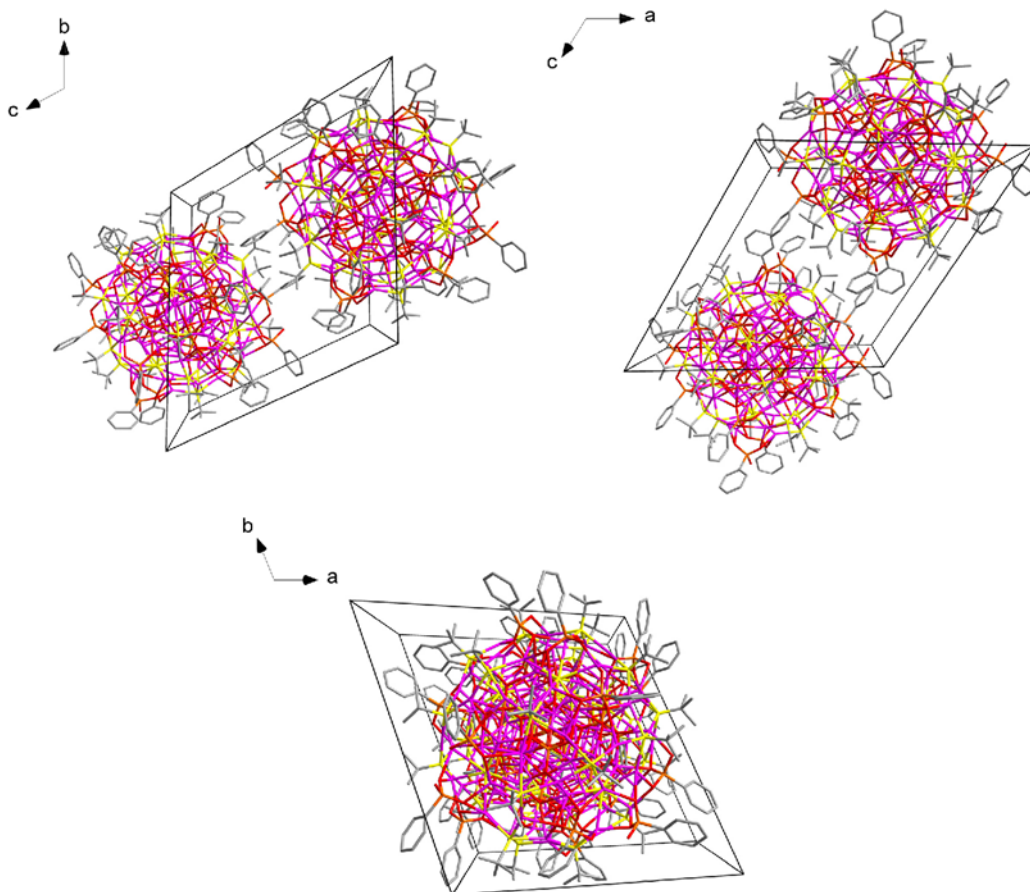

**Supplementary Figure 8:** Molecules packing in one unit cell for **SD/Ag90b** viewed along three different orientations.

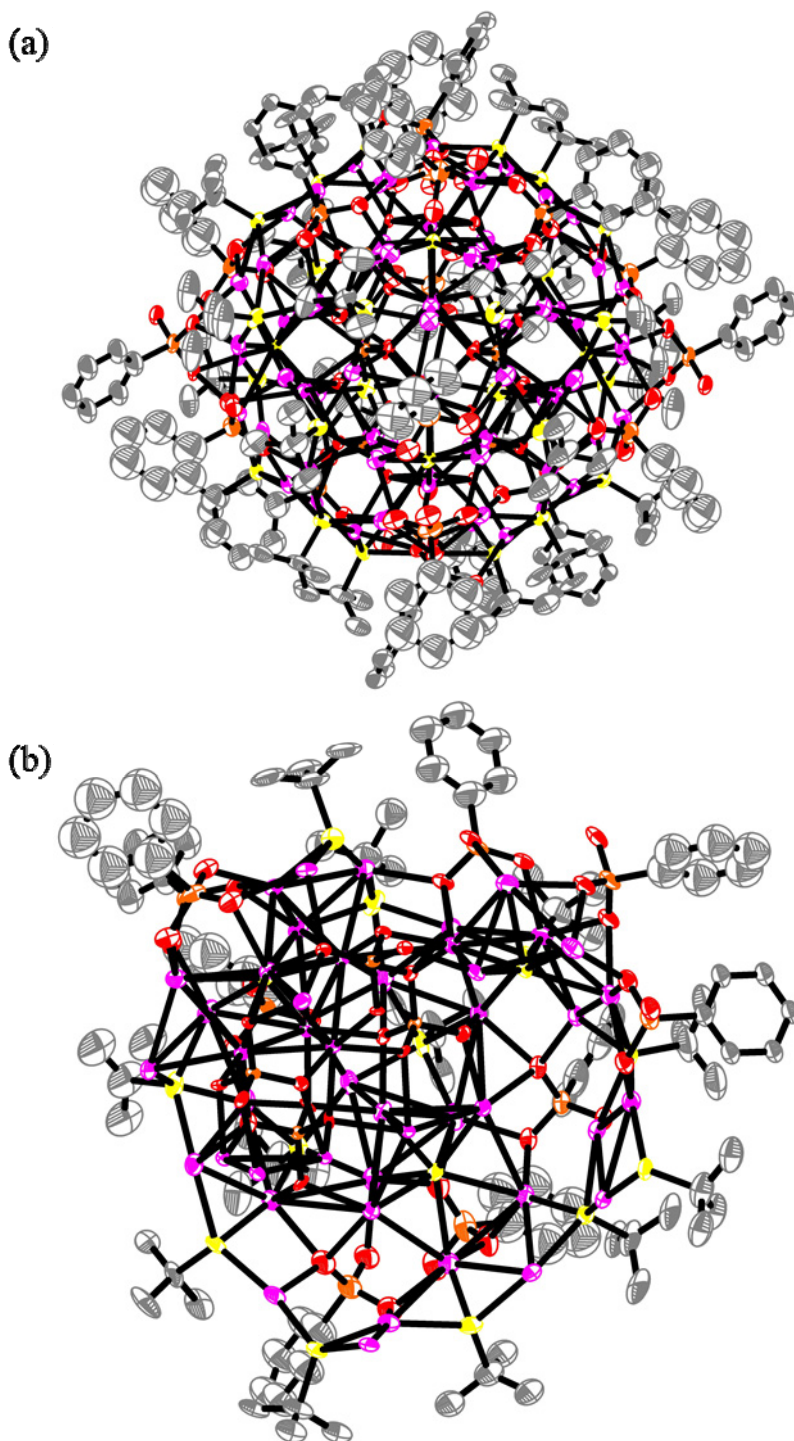

**Supplementary Figure 9:** ORTEP drawings (50% probability ellipsoids) of the total structure (a) and asymmetric unit structure (b) of **SD/Ag90a**. (Hydrogen atoms are omitted for clarity). Color legend: Ag, purple; P, brown; S, yellow; O, red; C, gray.

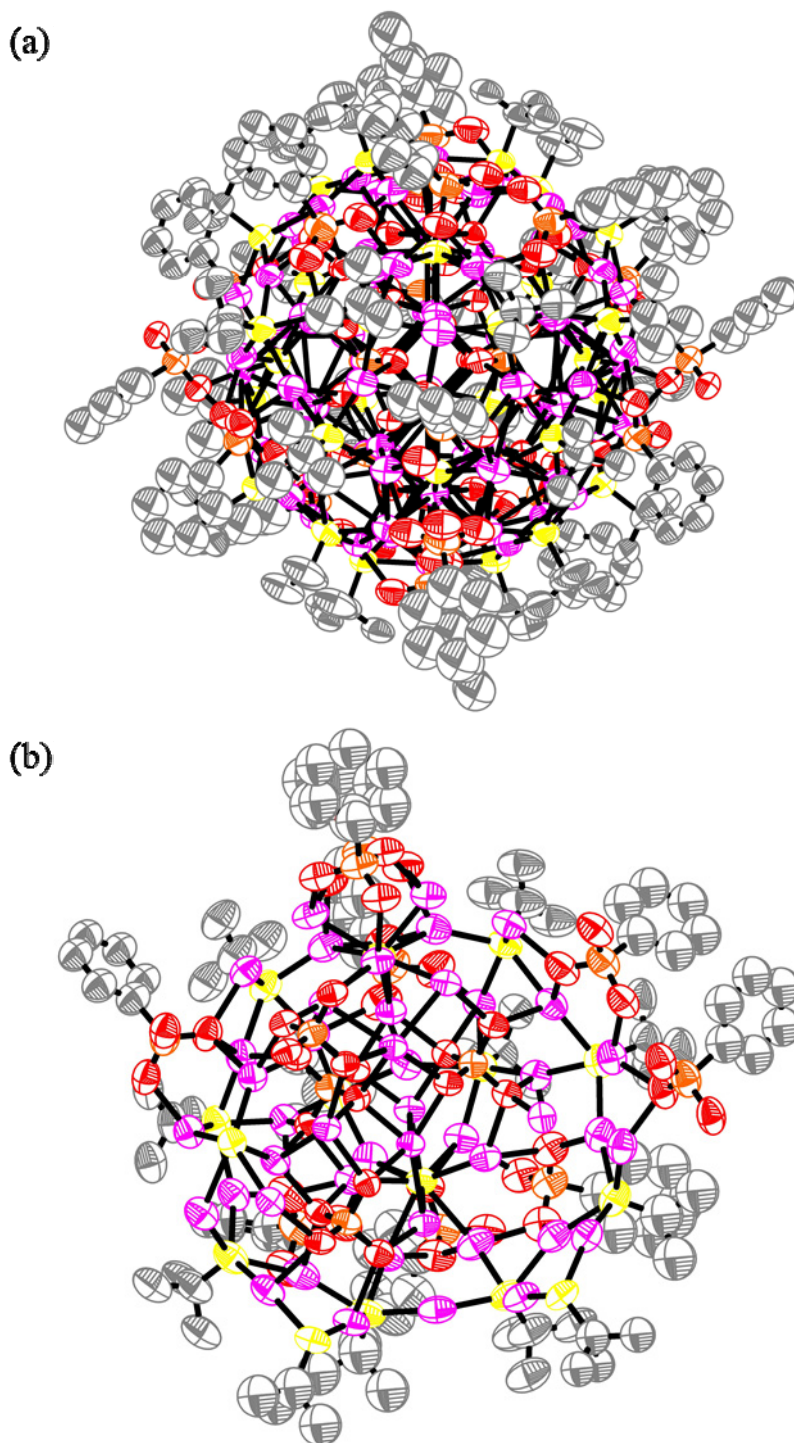

**Supplementary Figure 10:** ORTEP drawings (50% probability ellipsoids) of the total structure (a) and asymmetric unit structure (b) of **SD/Ag90b**. (Hydrogen atoms are omitted for clarity). Color legend: Ag, purple; P, brown; S, yellow; O, red; C, gray.

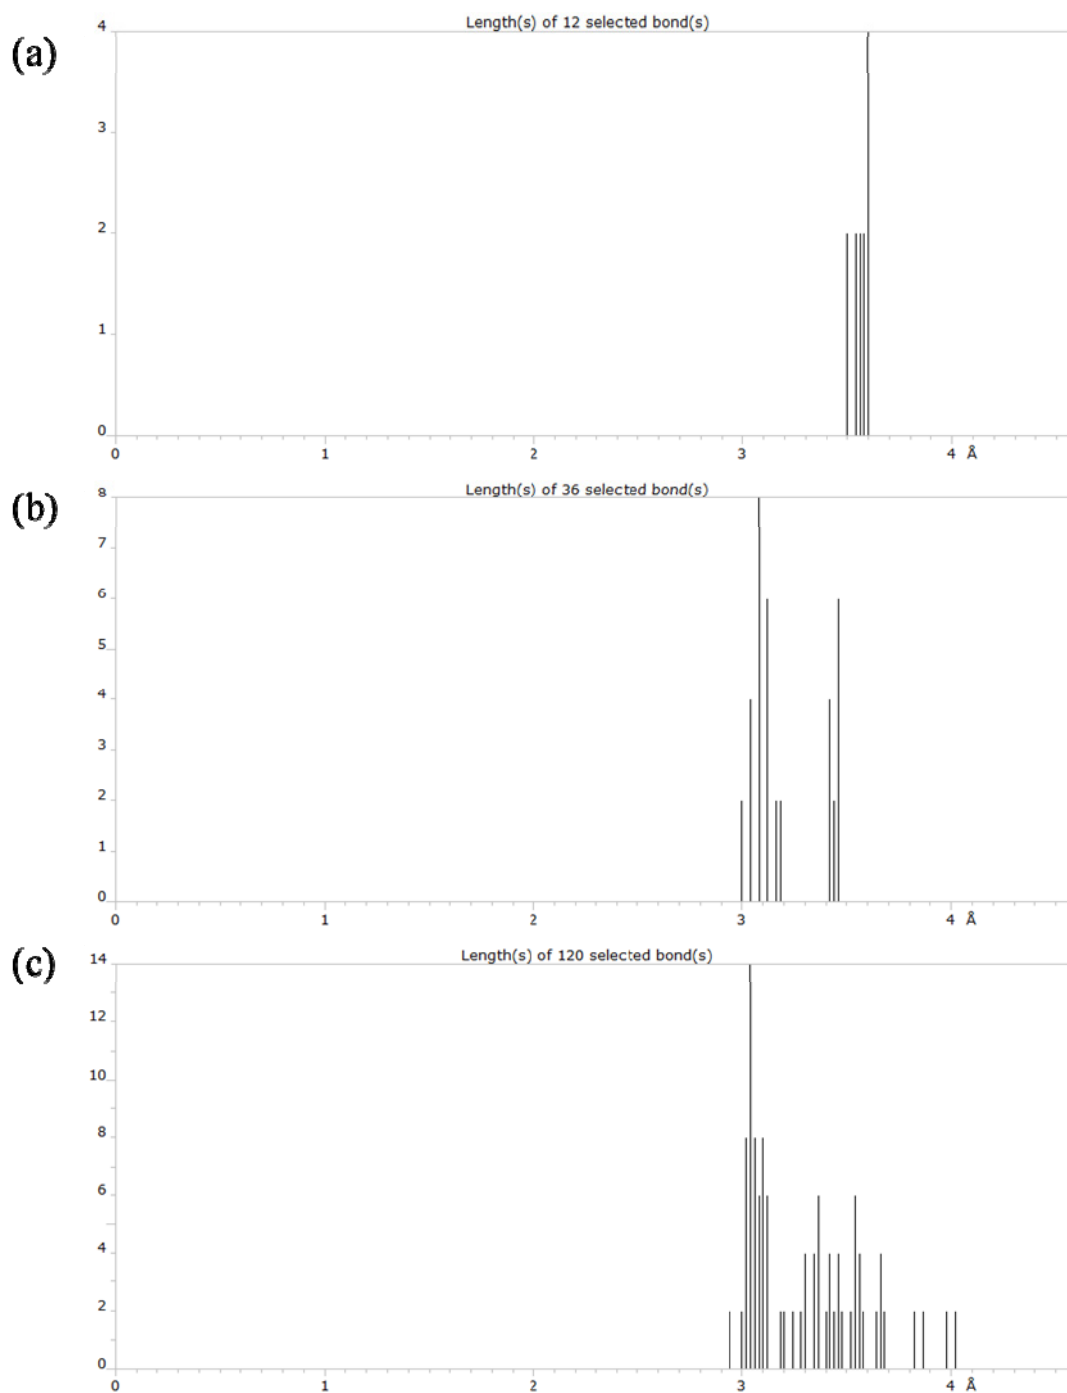

**Supplementary Figure 11:** Histogram of Ag-Ag edge lengths in three shells of SD/Ag90a. **(a)** The Ag-Ag edge lengths in the Ag<sub>6</sub> shell. **(b)** The Ag-Ag edge lengths in the Ag<sub>24</sub> shell. **(c)** The Ag-Ag edge lengths in the Ag<sub>60</sub> shell.

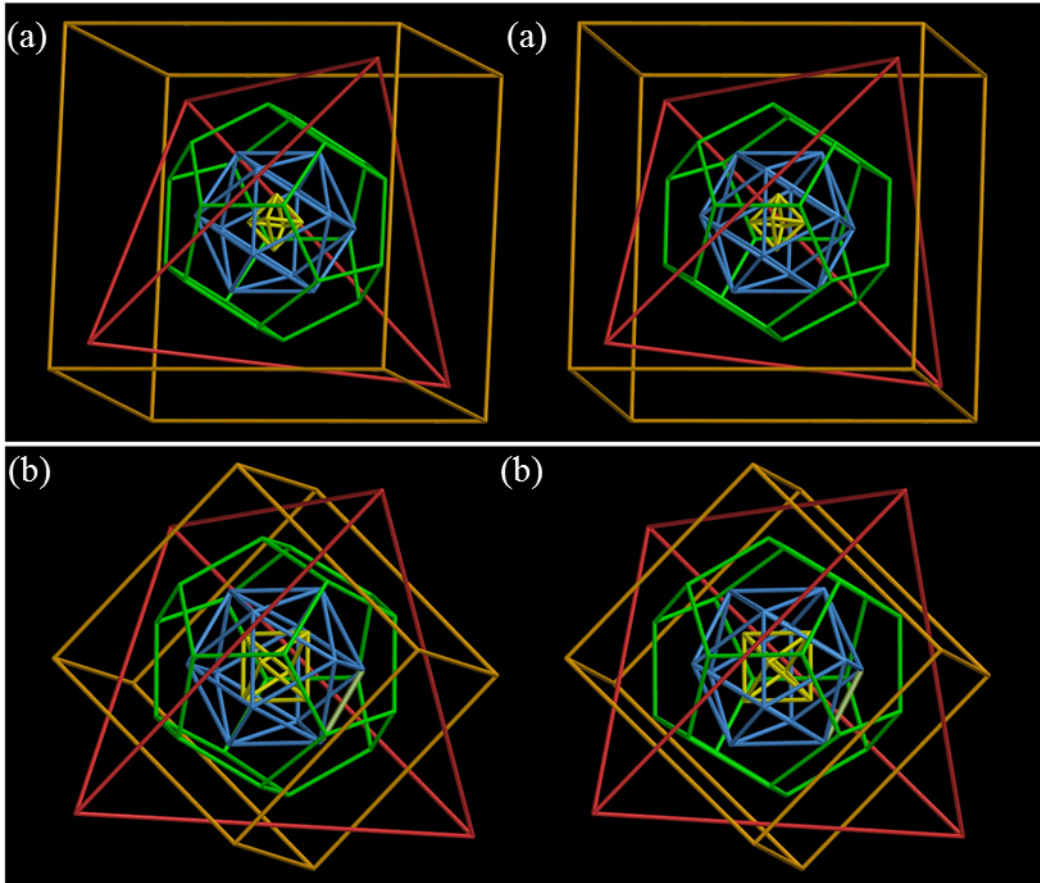

**Supplementary Figure 12:** Stereo view (**a** and **a**) of Kepler's Kosmos, corresponding to Fig. 4, and stereo view of the alternative alignment (**b** and **b**), corresponding to Fig. 5, in convergent (cross-eyed) stereo. The letters (**a**, **b**) are shown both left and right in each of the two parts of the figure as an aid to convergence. Note that the orientation of the octahedron and the cube in (**b**) are shifted by  $45^\circ$  from their positions in (**a**).



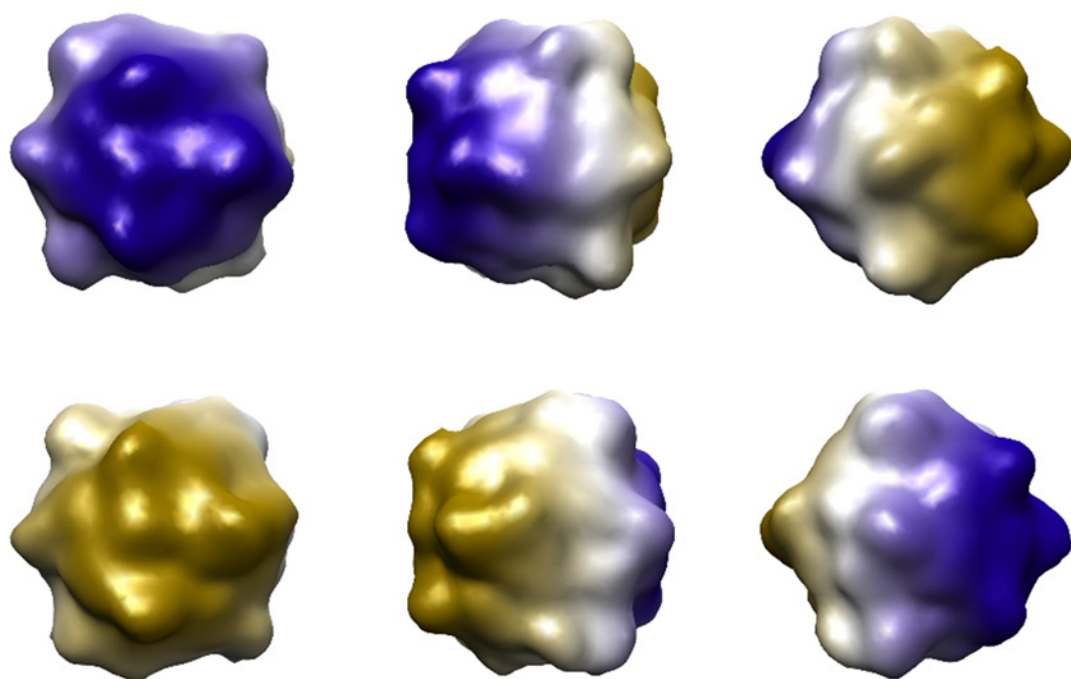

**Supplementary Figure 13:** The surface of **SD/Ag90a** calculated with the 3V Volume Assessor program<sup>7</sup> by rolling a virtual probe (1 Å) on the surface viewed along six different orientations

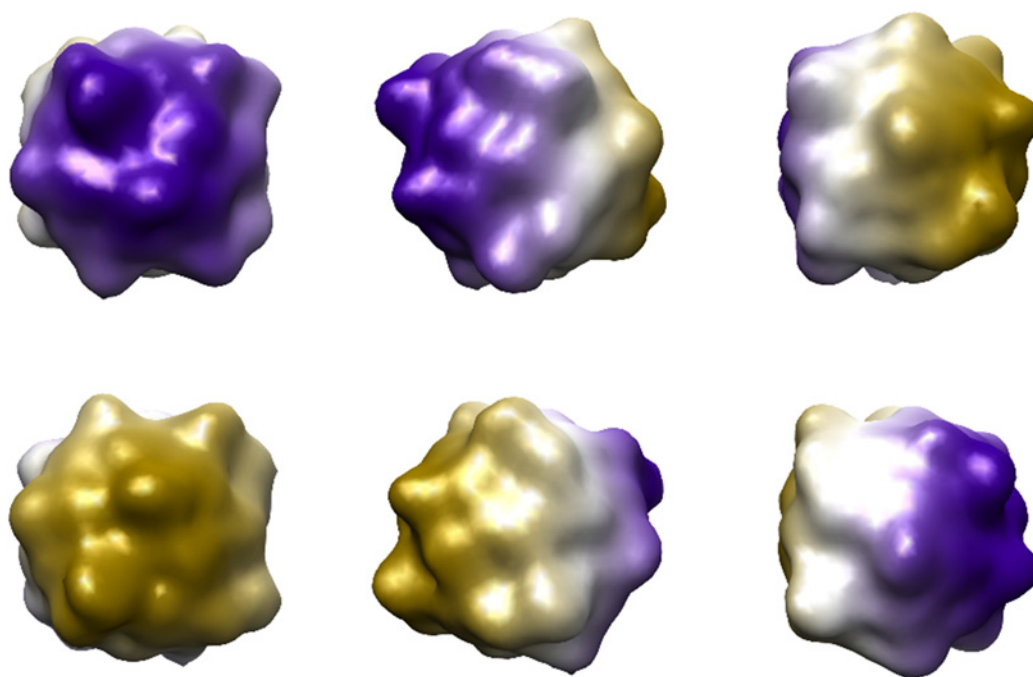

**Supplementary Figure 14:** The surface of **SD/Ag90b** calculated with the 3V Volume Assessor program<sup>7</sup> by rolling a virtual probe (1 Å) on the surface viewed along six different orientations.

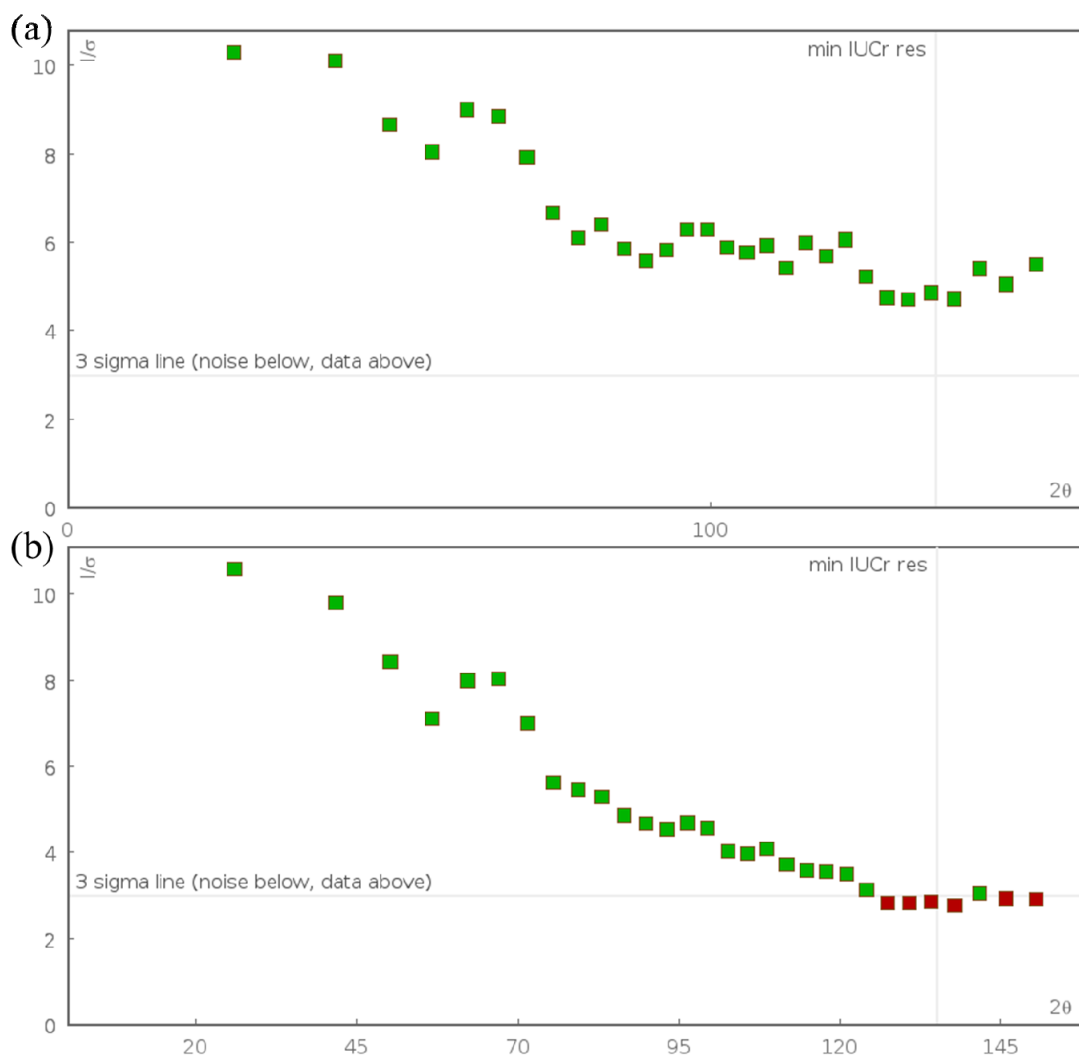

**Supplementary Figure 15:** The  $I/\sigma$  vs. resolution plots of **SD/Ag90a** (a) and **SD/Ag90b** (b) derived from reflection data statistics using OLEX 1.2.10<sup>5</sup>.

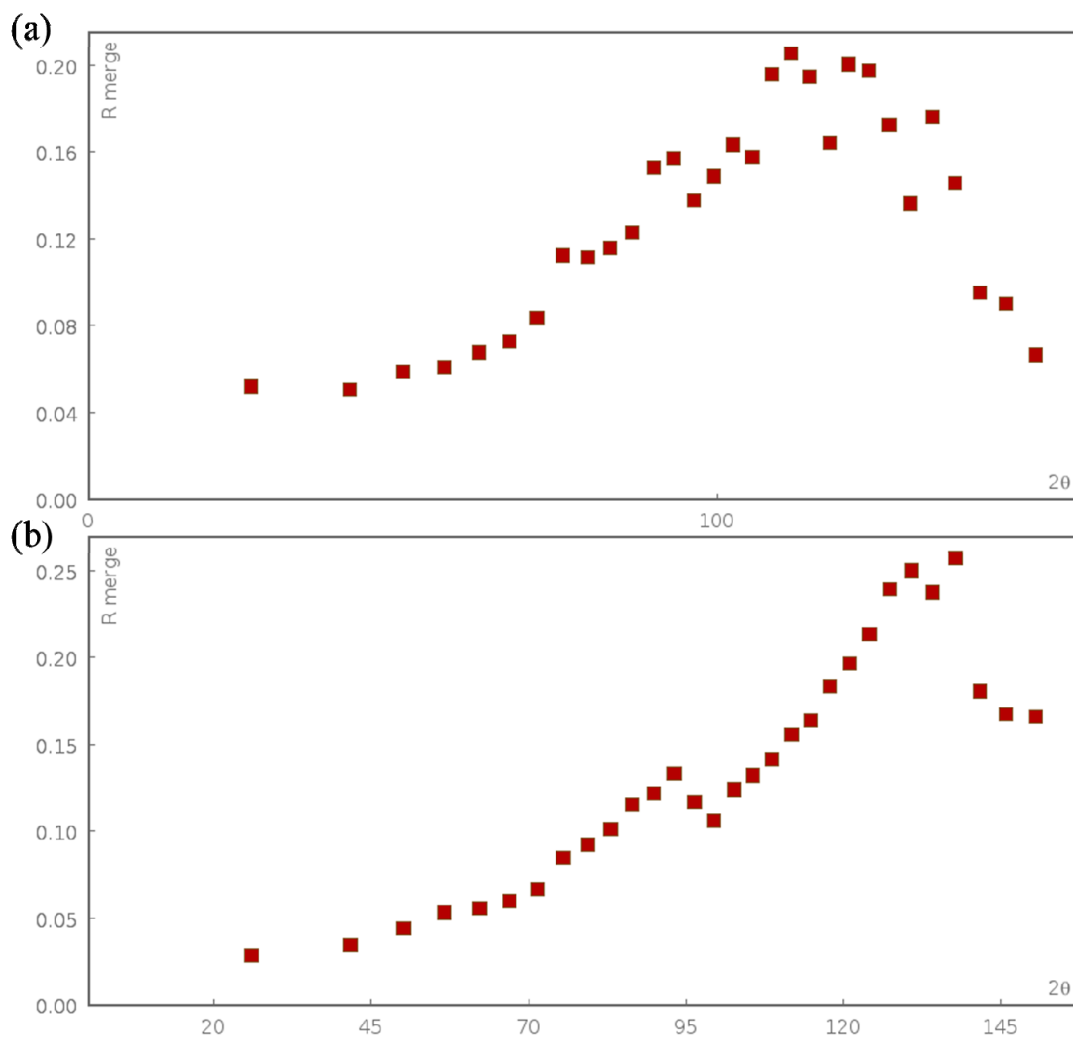

**Supplementary Figure 16:** The *R*merge vs. resolution plots of **SD/Ag90a** (a) and **SD/Ag90b** (b) derived from reflection data statistics using OLEX 1.2.10<sup>5</sup>.

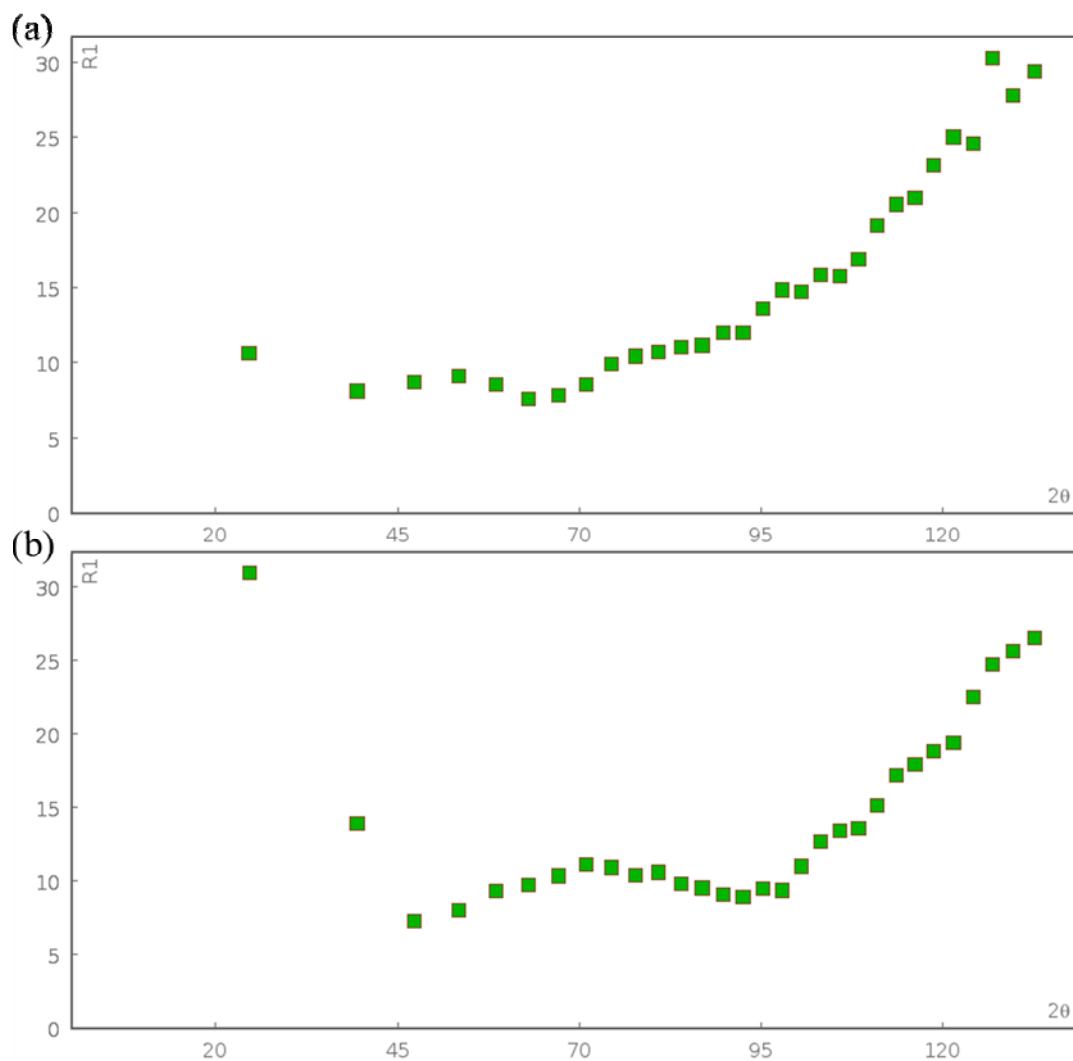

**Supplementary Figure 17:** The  $R_1$  factor vs. resolution plots of SD/Ag90a (a) and SD/Ag90b (b) derived from reflection data statistics using OLEX 1.2.10<sup>5</sup>.

**Supplementary Table 1: Crystal data and structure refinements for SD/Ag90a and SD/Ag90b**

|                                                              | <b>SD/Ag90a</b>                                                                                    | <b>SD/Ag90b</b>                                                                                    |
|--------------------------------------------------------------|----------------------------------------------------------------------------------------------------|----------------------------------------------------------------------------------------------------|
| Empirical formula                                            | C <sub>204</sub> H <sub>312</sub> Ag <sub>90</sub> O <sub>86</sub> P <sub>26</sub> S <sub>30</sub> | C <sub>204</sub> H <sub>312</sub> Ag <sub>90</sub> O <sub>86</sub> P <sub>26</sub> S <sub>30</sub> |
| Formula weight                                               | 15615.84                                                                                           | 15615.84                                                                                           |
| Temperature/K                                                | 100.00(10)                                                                                         | 99.99(10)                                                                                          |
| Crystal system                                               | monoclinic                                                                                         | triclinic                                                                                          |
| Space group                                                  | <i>P</i> 2 <sub>1</sub> / <i>n</i>                                                                 | <i>P</i> -1                                                                                        |
| <i>a</i> /Å                                                  | 24.1242(3)                                                                                         | 22.3588(4)                                                                                         |
| <i>b</i> /Å                                                  | 24.0789(3)                                                                                         | 22.6664(4)                                                                                         |
| <i>c</i> /Å                                                  | 31.5300(5)                                                                                         | 23.3001(5)                                                                                         |
| $\alpha$ /°                                                  | 90                                                                                                 | 110.5316(18)                                                                                       |
| $\beta$ /°                                                   | 92.4300(10)                                                                                        | 115.488(2)                                                                                         |
| $\gamma$ /°                                                  | 90                                                                                                 | 99.7102(16)                                                                                        |
| Volume/Å <sup>3</sup>                                        | 18298.8(4)                                                                                         | 9241.2(4)                                                                                          |
| <i>Z</i>                                                     | 2                                                                                                  | 1                                                                                                  |
| $\rho_{\text{calc}}$ /cm <sup>3</sup>                        | 2.834                                                                                              | 2.806                                                                                              |
| $\mu$ /mm <sup>-1</sup>                                      | 40.797                                                                                             | 40.392                                                                                             |
| <i>F</i> (000)                                               | 14648.0                                                                                            | 7324.0                                                                                             |
| Radiation                                                    | CuK $\alpha$ ( $\lambda$ = 1.54184)                                                                | CuK $\alpha$ ( $\lambda$ = 1.54184)                                                                |
| Reflections collected                                        | 99002                                                                                              | 94294                                                                                              |
| Independent reflections                                      | 32251 [ <i>R</i> <sub>int</sub> = 0.0995, <i>R</i> <sub>sigma</sub> = 0.0791]                      | 32640 [ <i>R</i> <sub>int</sub> = 0.0498, <i>R</i> <sub>sigma</sub> = 0.0636]                      |
| Data/restraints/parameters                                   | 32251/820/1896                                                                                     | 32640/495/1608                                                                                     |
| Goodness-of-fit on <i>F</i> <sup>2</sup>                     | 1.017                                                                                              | 1.174                                                                                              |
| Final <i>R</i> indexes [ <i>I</i> ≥ 2 $\sigma$ ( <i>I</i> )] | <i>R</i> <sub>1</sub> = 0.0963, <i>wR</i> <sub>2</sub> = 0.2357                                    | <i>R</i> <sub>1</sub> = 0.1288, <i>wR</i> <sub>2</sub> = 0.2849                                    |
| Final <i>R</i> indexes [all data]                            | <i>R</i> <sub>1</sub> = 0.1305, <i>wR</i> <sub>2</sub> = 0.2774                                    | <i>R</i> <sub>1</sub> = 0.1441, <i>wR</i> <sub>2</sub> = 0.3102                                    |
| Largest diff. peak/hole / e Å <sup>-3</sup>                  | 3.46/-3.44                                                                                         | 3.67/-2.41                                                                                         |

**Supplementary Table 2:** Selected bond distances (Å) and bond angles (°) for SD/Ag90a and SD/Ag90b

| SD/Ag90a              |             |                        |            |
|-----------------------|-------------|------------------------|------------|
| Ag1—Ag2               | 3.056 (3)   | Ag22—Ag26              | 3.119 (3)  |
| Ag1—Ag3               | 2.984 (2)   | Ag22—Ag27              | 3.230 (3)  |
| Ag1—Ag4               | 3.178 (2)   | Ag22—Ag28              | 3.364 (3)  |
| Ag1—Ag24 <sup>i</sup> | 3.287 (3)   | Ag22—S8                | 2.816 (6)  |
| Ag1—Ag40 <sup>i</sup> | 3.043 (3)   | Ag22—S10               | 2.467 (8)  |
| Ag1—S3                | 2.845 (5)   | Ag22—O20               | 2.35 (2)   |
| Ag1—S13 <sup>i</sup>  | 2.521 (7)   | Ag22—O24               | 2.329 (15) |
| Ag1—O6                | 2.32 (4)    | Ag23—Ag16 <sup>i</sup> | 2.986 (2)  |
| Ag1—O27               | 2.325 (19)  | Ag23—Ag25              | 3.216 (3)  |
| Ag2—Ag3               | 3.040 (2)   | Ag23—Ag41              | 3.046 (2)  |
| Ag2—Ag36 <sup>i</sup> | 3.171 (2)   | Ag23—S8                | 2.781 (5)  |
| Ag2—Ag38 <sup>i</sup> | 3.372 (3)   | Ag23—S9                | 2.517 (8)  |
| Ag2—Ag40 <sup>i</sup> | 3.121 (3)   | Ag23—O18               | 2.323 (19) |
| Ag2—S3                | 2.842 (5)   | Ag23—O21               | 2.28 (2)   |
| Ag2—S14 <sup>i</sup>  | 2.477 (7)   | Ag24—Ag1 <sup>i</sup>  | 3.287 (3)  |
| Ag2—O9                | 2.255 (18)  | Ag24—Ag25              | 3.053 (3)  |
| Ag2—O27               | 2.376 (19)  | Ag24—Ag31 <sup>i</sup> | 3.039 (3)  |
| Ag3—Ag4               | 3.083 (2)   | Ag24—S1 <sup>i</sup>   | 2.552 (7)  |
| Ag3—Ag29 <sup>i</sup> | 2.8639 (19) | Ag24—S13               | 2.525 (7)  |
| Ag3—Ag36 <sup>i</sup> | 3.139 (2)   | Ag24—O6 <sup>i</sup>   | 2.45 (3)   |
| Ag3—Ag40 <sup>i</sup> | 2.957 (2)   | Ag24—O29 <sup>i</sup>  | 2.494 (13) |
| Ag3—S3                | 2.453 (6)   | Ag25—Ag31 <sup>i</sup> | 3.137 (3)  |
| Ag3—O28               | 2.326 (14)  | Ag25—S9                | 2.512 (7)  |
| Ag3—O36 <sup>i</sup>  | 2.321 (15)  | Ag25—S13               | 2.508 (7)  |
| Ag4—Ag6               | 3.134 (2)   | Ag25—O18               | 2.50 (2)   |
| Ag4—Ag29 <sup>i</sup> | 3.139 (2)   | Ag25—O28 <sup>i</sup>  | 2.530 (14) |
| Ag4—Ag45 <sup>i</sup> | 3.184 (2)   | Ag26—Ag27              | 3.007 (2)  |
| Ag4—S3                | 2.466 (5)   | Ag26—Ag28              | 3.043 (3)  |
| Ag4—O7                | 2.52 (3)    | Ag26—Ag41              | 3.131 (3)  |
| Ag4—O29               | 2.353 (14)  | Ag26—S8                | 2.749 (5)  |
| Ag4—O42               | 2.367 (14)  | Ag26—S12               | 2.481 (6)  |
| Ag5—Ag6               | 3.076 (2)   | Ag26—O16               | 2.361 (19) |
| Ag5—Ag7               | 3.190 (2)   | Ag26—O20               | 2.33 (2)   |
| Ag5—Ag8               | 3.301 (2)   | Ag27—Ag28              | 2.933 (2)  |
| Ag5—Ag36 <sup>i</sup> | 3.139 (2)   | Ag27—Ag41              | 3.120 (2)  |
| Ag5—Ag45 <sup>i</sup> | 3.113 (2)   | Ag27—S8                | 2.432 (5)  |
| Ag5—S3                | 2.889 (6)   | Ag27—O39               | 2.328 (13) |
| Ag5—S5                | 2.463 (6)   | Ag27—O40               | 2.293 (13) |
| Ag5—O9                | 2.317 (17)  | Ag28—S10               | 2.467 (6)  |

|                        |            |                        |             |
|------------------------|------------|------------------------|-------------|
| Ag5—O25                | 2.325 (18) | Ag28—S12               | 2.487 (6)   |
| Ag6—Ag7                | 3.027 (3)  | Ag28—O8                | 2.33 (4)    |
| Ag6—Ag14               | 3.363 (2)  | Ag29—Ag3 <sup>i</sup>  | 2.8640 (19) |
| Ag6—Ag45 <sup>i</sup>  | 2.957 (2)  | Ag29—Ag4 <sup>i</sup>  | 3.139 (2)   |
| Ag6—S3                 | 2.722 (6)  | Ag29—Ag36              | 3.1661 (19) |
| Ag6—S4                 | 2.516 (6)  | Ag29—Ag45              | 2.866 (2)   |
| Ag6—O5                 | 2.33 (3)   | Ag29—O30 <sup>i</sup>  | 2.447 (13)  |
| Ag6—O25                | 2.363 (18) | Ag29—O35               | 2.438 (13)  |
| Ag7—Ag45 <sup>i</sup>  | 2.938 (2)  | Ag29—O38               | 2.386 (13)  |
| Ag7—S4                 | 2.482 (6)  | Ag29—O43 <sup>i</sup>  | 2.405 (12)  |
| Ag7—S5                 | 2.450 (6)  | Ag30—Ag35              | 2.8683 (19) |
| Ag7—O22                | 2.408 (16) | Ag30—Ag42              | 3.151 (2)   |
| Ag8—Ag9                | 3.114 (2)  | Ag30—Ag44              | 3.1789 (19) |
| Ag8—Ag10               | 3.093 (2)  | Ag30—O30               | 2.424 (13)  |
| Ag8—S5                 | 2.492 (6)  | Ag30—O35               | 2.389 (12)  |
| Ag8—S6                 | 2.526 (6)  | Ag30—O38               | 2.397 (13)  |
| Ag8—O2                 | 2.44 (5)   | Ag30—O43               | 2.394 (12)  |
| Ag8—O34 <sup>i</sup>   | 2.558 (14) | Ag31—Ag24 <sup>i</sup> | 3.039 (3)   |
| Ag9—Ag10               | 3.056 (2)  | Ag31—Ag25 <sup>i</sup> | 3.137 (3)   |
| Ag9—S6                 | 2.510 (6)  | Ag31—S1                | 2.475 (7)   |
| Ag9—S7                 | 2.499 (6)  | Ag31—S9 <sup>i</sup>   | 2.524 (9)   |
| Ag9—O13 <sup>i</sup>   | 2.43 (2)   | Ag31—O15               | 2.47 (2)    |
| Ag9—O32 <sup>i</sup>   | 2.488 (12) | Ag31—O31               | 2.474 (13)  |
| Ag10—S5                | 2.589 (6)  | Ag32—Ag33              | 2.957 (2)   |
| Ag10—S7                | 2.578 (6)  | Ag32—Ag34              | 3.026 (3)   |
| Ag10—O23               | 2.351 (17) | Ag32—Ag35              | 2.974 (2)   |
| Ag10—O33 <sup>i</sup>  | 2.514 (13) | Ag32—Ag44              | 3.279 (2)   |
| Ag11—Ag12              | 3.108 (3)  | Ag32—S6 <sup>i</sup>   | 2.569 (6)   |
| Ag11—Ag13              | 3.165 (2)  | Ag32—S11               | 2.777 (5)   |
| Ag11—Ag16 <sup>i</sup> | 2.961 (2)  | Ag32—O12               | 2.360 (18)  |
| Ag11—Ag23              | 3.069 (3)  | Ag32—O13               | 2.23 (2)    |
| Ag11—S7                | 2.497 (6)  | Ag33—Ag34              | 3.240 (3)   |
| Ag11—S8                | 2.827 (5)  | Ag33—Ag35              | 2.936 (2)   |
| Ag11—O21               | 2.380 (18) | Ag33—S6 <sup>i</sup>   | 2.441 (6)   |
| Ag11—O24               | 2.299 (17) | Ag33—S15               | 2.464 (7)   |
| Ag12—Ag16 <sup>i</sup> | 2.942 (2)  | Ag33—O2 <sup>i</sup>   | 2.41 (4)    |
| Ag12—Ag23              | 3.111 (3)  | Ag34—Ag35              | 3.116 (2)   |
| Ag12—S7                | 2.431 (6)  | Ag34—Ag37              | 3.301 (3)   |
| Ag12—S9                | 2.448 (7)  | Ag34—Ag42              | 3.075 (2)   |
| Ag12—O15 <sup>i</sup>  | 2.41 (2)   | Ag34—S11               | 2.814 (5)   |
| Ag13—Ag16 <sup>i</sup> | 3.092 (2)  | Ag34—S15               | 2.469 (7)   |
| Ag13—Ag20              | 3.185 (2)  | Ag34—O3                | 2.41 (3)    |
| Ag13—Ag21              | 3.380 (2)  | Ag34—O12               | 2.388 (17)  |



|                        |             |                        |            |
|------------------------|-------------|------------------------|------------|
| Ag13—Ag22              | 3.050 (2)   | Ag35—Ag42              | 3.056 (2)  |
| Ag13—Ag27              | 3.083 (2)   | Ag35—Ag44              | 3.137 (2)  |
| Ag13—S8                | 2.530 (5)   | Ag35—S11               | 2.450 (5)  |
| Ag13—O22               | 2.500 (16)  | Ag35—O34               | 2.310 (15) |
| Ag13—O33 <sup>i</sup>  | 2.353 (13)  | Ag35—O37               | 2.282 (15) |
| Ag13—O41               | 2.351 (13)  | Ag36—Ag2 <sup>i</sup>  | 3.171 (2)  |
| Ag14—Ag19              | 3.032 (3)   | Ag36—Ag3 <sup>i</sup>  | 3.139 (2)  |
| Ag14—Ag21              | 3.086 (3)   | Ag36—Ag5 <sup>i</sup>  | 3.139 (2)  |
| Ag14—S2                | 2.522 (7)   | Ag36—Ag45              | 3.017 (2)  |
| Ag14—S4                | 2.503 (6)   | Ag36—S3 <sup>i</sup>   | 2.516 (5)  |
| Ag14—O7                | 2.34 (4)    | Ag36—O2 <sup>i</sup>   | 2.45 (4)   |
| Ag14—O42               | 2.462 (13)  | Ag36—O34               | 2.364 (13) |
| Ag15—Ag17              | 3.017 (3)   | Ag36—O37               | 2.371 (15) |
| Ag15—Ag18              | 2.937 (2)   | Ag37—Ag38              | 3.098 (3)  |
| Ag15—Ag43              | 3.138 (3)   | Ag37—Ag39              | 3.075 (3)  |
| Ag15—S1                | 2.498 (8)   | Ag37—S12               | 2.547 (7)  |
| Ag15—S2                | 2.456 (11)  | Ag37—S15               | 2.489 (7)  |
| Ag15—O7                | 2.40 (4)    | Ag37—O4                | 2.24 (4)   |
| Ag16—Ag11 <sup>i</sup> | 2.961 (2)   | Ag37—O39               | 2.487 (14) |
| Ag16—Ag12 <sup>i</sup> | 2.942 (2)   | Ag38—Ag2 <sup>i</sup>  | 3.372 (3)  |
| Ag16—Ag13 <sup>i</sup> | 3.092 (2)   | Ag38—Ag39              | 3.059 (2)  |
| Ag16—Ag20 <sup>i</sup> | 2.866 (2)   | Ag38—S14               | 2.521 (6)  |
| Ag16—Ag23 <sup>i</sup> | 2.986 (2)   | Ag38—S15               | 2.587 (8)  |
| Ag16—Ag41 <sup>i</sup> | 3.172 (2)   | Ag38—O1 <sup>i</sup>   | 2.54 (3)   |
| Ag16—S8 <sup>i</sup>   | 2.434 (5)   | Ag38—O37               | 2.490 (13) |
| Ag16—O31               | 2.328 (14)  | Ag39—S12               | 2.470 (7)  |
| Ag16—O32               | 2.301 (13)  | Ag39—S14               | 2.526 (6)  |
| Ag17—Ag18              | 2.987 (2)   | Ag39—O17               | 2.47 (2)   |
| Ag17—Ag31              | 3.354 (3)   | Ag39—O36               | 2.465 (14) |
| Ag17—Ag43              | 3.072 (3)   | Ag40—Ag1 <sup>i</sup>  | 3.043 (3)  |
| Ag17—Ag44              | 3.156 (2)   | Ag40—Ag2 <sup>i</sup>  | 3.121 (3)  |
| Ag17—S1                | 2.520 (7)   | Ag40—Ag3 <sup>i</sup>  | 2.957 (2)  |
| Ag17—S11               | 2.801 (5)   | Ag40—S13               | 2.440 (7)  |
| Ag17—O11               | 2.344 (18)  | Ag40—S14               | 2.461 (7)  |
| Ag17—O14               | 2.34 (2)    | Ag40—O17               | 2.47 (2)   |
| Ag18—Ag30              | 2.8678 (19) | Ag41—Ag16 <sup>i</sup> | 3.172 (2)  |
| Ag18—Ag42              | 3.089 (2)   | Ag41—S8                | 2.469 (5)  |
| Ag18—Ag43              | 3.045 (2)   | Ag41—O17               | 2.450 (18) |
| Ag18—Ag44              | 3.046 (2)   | Ag41—O28 <sup>i</sup>  | 2.366 (14) |
| Ag18—S11               | 2.443 (5)   | Ag41—O36               | 2.365 (13) |
| Ag18—O29               | 2.319 (14)  | Ag42—Ag43              | 3.086 (2)  |
| Ag18—O42               | 2.343 (13)  | Ag42—S11               | 2.511 (5)  |
| Ag19—Ag21              | 3.054 (2)   | Ag42—O39               | 2.339 (12) |

|                           |             |                                        |             |
|---------------------------|-------------|----------------------------------------|-------------|
| Ag19—S2                   | 2.585 (10)  | Ag42—O40                               | 2.351 (13)  |
| Ag19—S10                  | 2.633 (8)   | Ag43—S2                                | 2.481 (7)   |
| Ag19—O8                   | 2.58 (4)    | Ag43—S11                               | 2.785 (5)   |
| Ag19—O40                  | 2.441 (13)  | Ag43—O3                                | 2.20 (3)    |
| Ag20—Ag16 <sup>i</sup>    | 2.866 (2)   | Ag43—O11                               | 2.394 (17)  |
| Ag20—Ag27                 | 2.858 (2)   | Ag44—S11                               | 2.477 (5)   |
| Ag20—Ag41                 | 3.2400 (19) | Ag44—O31                               | 2.344 (14)  |
| Ag20—O30 <sup>i</sup>     | 2.410 (13)  | Ag44—O32                               | 2.377 (13)  |
| Ag20—O35 <sup>i</sup>     | 2.421 (12)  | Ag45—Ag4 <sup>i</sup>                  | 3.184 (2)   |
| Ag20—O38                  | 2.433 (12)  | Ag45—Ag5 <sup>i</sup>                  | 3.113 (2)   |
| Ag20—O43                  | 2.414 (12)  | Ag45—Ag6 <sup>i</sup>                  | 2.957 (2)   |
| Ag21—Ag22                 | 3.346 (3)   | Ag45—Ag7 <sup>i</sup>                  | 2.939 (2)   |
| Ag21—S4                   | 2.522 (6)   | Ag45—S3 <sup>i</sup>                   | 2.449 (5)   |
| Ag21—S10                  | 2.468 (6)   | Ag45—O33                               | 2.312 (13)  |
| Ag21—O22                  | 2.449 (16)  | Ag45—O41 <sup>i</sup>                  | 2.361 (13)  |
| Ag21—O41                  | 2.476 (14)  |                                        |             |
| S13 <sup>i</sup> —Ag1—S3  | 136.52 (19) | S9—Ag23—S8                             | 138.0 (2)   |
| O6—Ag1—S3                 | 112.1 (10)  | O18—Ag23—S8                            | 119.4 (5)   |
| O6—Ag1—S13 <sup>i</sup>   | 84.5 (10)   | O18—Ag23—S9                            | 83.9 (6)    |
| O6—Ag1—O27                | 117.3 (10)  | O21—Ag23—S8                            | 80.1 (6)    |
| O27—Ag1—S3                | 77.7 (5)    | O21—Ag23—S9                            | 125.4 (6)   |
| O27—Ag1—S13 <sup>i</sup>  | 131.5 (6)   | O21—Ag23—O18                           | 112.7 (7)   |
| S14 <sup>i</sup> —Ag2—S3  | 132.41 (18) | S13—Ag24—S1 <sup>i</sup>               | 156.1 (2)   |
| O9—Ag2—S3                 | 81.6 (4)    | O6 <sup>i</sup> —Ag24—S1 <sup>i</sup>  | 112.8 (9)   |
| O9—Ag2—S14 <sup>i</sup>   | 128.0 (5)   | O6 <sup>i</sup> —Ag24—S13              | 81.7 (9)    |
| O9—Ag2—O27                | 86.6 (7)    | O6 <sup>i</sup> —Ag24—O29 <sup>i</sup> | 104.6 (9)   |
| O27—Ag2—S3                | 77.0 (5)    | O29 <sup>i</sup> —Ag24—S1 <sup>i</sup> | 81.3 (3)    |
| O27—Ag2—S14 <sup>i</sup>  | 132.4 (5)   | O29 <sup>i</sup> —Ag24—S13             | 114.4 (3)   |
| O28—Ag3—S3                | 136.1 (4)   | S9—Ag25—O28 <sup>i</sup>               | 110.7 (3)   |
| O36 <sup>i</sup> —Ag3—S3  | 135.3 (3)   | S13—Ag25—S9                            | 155.0 (3)   |
| O36 <sup>i</sup> —Ag3—O28 | 86.4 (5)    | S13—Ag25—O28 <sup>i</sup>              | 82.5 (3)    |
| S3—Ag4—O7                 | 124.1 (8)   | O18—Ag25—S9                            | 80.5 (5)    |
| O29—Ag4—S3                | 131.9 (4)   | O18—Ag25—S13                           | 116.2 (5)   |
| O29—Ag4—O7                | 93.1 (9)    | O18—Ag25—O28 <sup>i</sup>              | 109.0 (6)   |
| O29—Ag4—O42               | 85.4 (5)    | S12—Ag26—S8                            | 132.71 (18) |
| O42—Ag4—S3                | 130.5 (3)   | O16—Ag26—S8                            | 104.5 (5)   |
| O42—Ag4—O7                | 73.5 (9)    | O16—Ag26—S12                           | 106.9 (5)   |
| S5—Ag5—S3                 | 130.15 (17) | O20—Ag26—S8                            | 80.3 (5)    |
| O9—Ag5—S3                 | 79.6 (4)    | O20—Ag26—S12                           | 135.8 (6)   |
| O9—Ag5—S5                 | 133.5 (5)   | O20—Ag26—O16                           | 86.2 (8)    |
| O9—Ag5—O25                | 86.4 (7)    | O39—Ag27—S8                            | 135.3 (3)   |
| O25—Ag5—S3                | 76.4 (5)    | O40—Ag27—S8                            | 138.5 (3)   |
| O25—Ag5—S5                | 130.3 (6)   | O40—Ag27—O39                           | 84.1 (4)    |

|                                        |             |                                         |             |
|----------------------------------------|-------------|-----------------------------------------|-------------|
| S4—Ag6—S3                              | 137.93 (17) | S10—Ag28—S12                            | 156.6 (2)   |
| O5—Ag6—S3                              | 103.1 (10)  | O8—Ag28—S10                             | 94.8 (10)   |
| O5—Ag6—S4                              | 106.3 (10)  | O8—Ag28—S12                             | 108.1 (10)  |
| O5—Ag6—O25                             | 87.3 (10)   | O35—Ag29—O30 <sup>i</sup>               | 134.1 (4)   |
| O25—Ag6—S3                             | 79.2 (5)    | O38—Ag29—O30 <sup>i</sup>               | 81.3 (4)    |
| O25—Ag6—S4                             | 131.2 (6)   | O38—Ag29—O35                            | 79.2 (4)    |
| S5—Ag7—S4                              | 160.5 (2)   | O38—Ag29—O43 <sup>i</sup>               | 130.4 (4)   |
| O22—Ag7—S4                             | 89.2 (4)    | O43 <sup>i</sup> —Ag29—O30 <sup>i</sup> | 81.4 (4)    |
| O22—Ag7—S5                             | 110.1 (4)   | O43 <sup>i</sup> —Ag29—O35              | 80.4 (4)    |
| S5—Ag8—S6                              | 157.4 (2)   | O35—Ag30—O30                            | 82.9 (4)    |
| S5—Ag8—O34 <sup>i</sup>                | 110.3 (3)   | O35—Ag30—O38                            | 80.0 (4)    |
| S6—Ag8—O34 <sup>i</sup>                | 81.0 (3)    | O35—Ag30—O43                            | 133.5 (4)   |
| O2—Ag8—S5                              | 117.0 (10)  | O38—Ag30—O30                            | 134.5 (4)   |
| O2—Ag8—S6                              | 84.6 (10)   | O43—Ag30—O30                            | 82.1 (4)    |
| O2—Ag8—O34 <sup>i</sup>                | 73.2 (10)   | O43—Ag30—O38                            | 80.0 (4)    |
| S7—Ag9—S6                              | 158.2 (2)   | S1—Ag31—S9 <sup>i</sup>                 | 155.2 (2)   |
| O13 <sup>i</sup> —Ag9—S6               | 78.1 (5)    | O15—Ag31—S1                             | 115.6 (6)   |
| O13 <sup>i</sup> —Ag9—S7               | 116.5 (5)   | O15—Ag31—S9 <sup>i</sup>                | 85.6 (6)    |
| O13 <sup>i</sup> —Ag9—O32 <sup>i</sup> | 104.0 (6)   | O15—Ag31—O31                            | 79.6 (5)    |
| O32 <sup>i</sup> —Ag9—S6               | 114.9 (4)   | O31—Ag31—S1                             | 113.3 (4)   |
| O32 <sup>i</sup> —Ag9—S7               | 78.7 (4)    | O31—Ag31—S9 <sup>i</sup>                | 81.8 (4)    |
| S7—Ag10—S5                             | 159.57 (19) | S6 <sup>i</sup> —Ag32—S11               | 135.23 (17) |
| O23—Ag10—S5                            | 96.5 (4)    | O12—Ag32—S6 <sup>i</sup>                | 135.5 (4)   |
| O23—Ag10—S7                            | 95.3 (4)    | O12—Ag32—S11                            | 79.6 (4)    |
| O23—Ag10—O33 <sup>i</sup>              | 119.4 (5)   | O13—Ag32—S6 <sup>i</sup>                | 80.5 (6)    |
| O33 <sup>i</sup> —Ag10—S5              | 82.5 (3)    | O13—Ag32—S11                            | 108.9 (6)   |
| O33 <sup>i</sup> —Ag10—S7              | 106.0 (3)   | O13—Ag32—O12                            | 118.5 (7)   |
| S7—Ag11—S8                             | 132.04 (18) | S6 <sup>i</sup> —Ag33—S15               | 161.6 (2)   |
| O21—Ag11—S7                            | 130.7 (6)   | O2 <sup>i</sup> —Ag33—S6 <sup>i</sup>   | 87.3 (11)   |
| O21—Ag11—S8                            | 77.6 (5)    | O2 <sup>i</sup> —Ag33—S15               | 110.9 (11)  |
| O24—Ag11—S7                            | 124.1 (4)   | S15—Ag34—S11                            | 130.78 (19) |
| O24—Ag11—S8                            | 86.7 (4)    | O3—Ag34—S11                             | 83.3 (7)    |
| O24—Ag11—O21                           | 90.1 (7)    | O3—Ag34—S15                             | 131.9 (8)   |
| S7—Ag12—S9                             | 161.4 (3)   | O12—Ag34—S11                            | 78.4(4)     |
| O15 <sup>i</sup> —Ag12—S7              | 110.0 (5)   | O12—Ag34—S15                            | 127.5 (5)   |
| O15 <sup>i</sup> —Ag12—S9              | 88.6 (6)    | O12—Ag34—O3                             | 86.7 (9)    |
| O22—Ag13—S8                            | 125.8 (4)   | O34—Ag35—S11                            | 135.8 (4)   |
| O33 <sup>i</sup> —Ag13—S8              | 129.6 (4)   | O37—Ag35—S11                            | 137.2 (4)   |
| O33 <sup>i</sup> —Ag13—O22             | 90.6 (5)    | O37—Ag35—O34                            | 85.5 (5)    |
| O41—Ag13—S8                            | 130.2 (3)   | O2 <sup>i</sup> —Ag36—S3 <sup>i</sup>   | 126.1 (10)  |
| O41—Ag13—O22                           | 80.3 (5)    | O34—Ag36—S3 <sup>i</sup>                | 132.6 (4)   |
| O41—Ag13—O33 <sup>i</sup>              | 84.4 (4)    | O34—Ag36—O2 <sup>i</sup>                | 76.5 (11)   |
| S4—Ag14—S2                             | 157.2 (3)   | O34—Ag36—O37                            | 82.3 (5)    |

|                                         |             |                            |           |
|-----------------------------------------|-------------|----------------------------|-----------|
| O7—Ag14—S2                              | 83.3 (9)    | O37—Ag36—S3 <sup>i</sup>   | 131.2 (4) |
| O7—Ag14—S4                              | 116.3 (9)   | O37—Ag36—O2 <sup>i</sup>   | 89.9 (11) |
| O7—Ag14—O42                             | 75.0 (8)    | S15—Ag37—S12               | 156.8 (2) |
| O42—Ag14—S2                             | 80.9 (3)    | O4—Ag37—S12                | 97.5 (10) |
| O42—Ag14—S4                             | 114.1 (3)   | O4—Ag37—S15                | 91.6 (10) |
| S2—Ag15—S1                              | 163.2 (3)   | O4—Ag37—O39                | 122.8 (9) |
| O7—Ag15—S1                              | 112.8 (10)  | O39—Ag37—S12               | 81.9 (3)  |
| O7—Ag15—S2                              | 83.6 (10)   | O39—Ag37—S15               | 110.8 (3) |
| O31—Ag16—S8 <sup>i</sup>                | 133.8 (4)   | S14—Ag38—S15               | 155.9 (2) |
| O32—Ag16—S8 <sup>i</sup>                | 138.1 (3)   | S14—Ag38—O1 <sup>i</sup>   | 88.2 (8)  |
| O32—Ag16—O31                            | 86.7 (5)    | O1 <sup>i</sup> —Ag38—S15  | 102.0 (8) |
| S1—Ag17—S11                             | 135.3 (2)   | O37—Ag38—S14               | 112.4 (4) |
| O11—Ag17—S1                             | 133.2 (5)   | O37—Ag38—S15               | 81.0 (4)  |
| O11—Ag17—S11                            | 78.5 (4)    | O37—Ag38—O1 <sup>i</sup>   | 121.4 (8) |
| O14—Ag17—S1                             | 107.9 (6)   | S12—Ag39—S14               | 157.5 (2) |
| O14—Ag17—S11                            | 103.8 (5)   | O17—Ag39—S12               | 112.7 (5) |
| O14—Ag17—O11                            | 86.7 (7)    | O17—Ag39—S14               | 86.6 (5)  |
| O29—Ag18—S11                            | 136.7 (4)   | O36—Ag39—S12               | 111.9 (4) |
| O29—Ag18—O42                            | 86.7 (5)    | O36—Ag39—S14               | 82.5 (4)  |
| O42—Ag18—S11                            | 135.1 (4)   | O36—Ag39—O17               | 78.3 (5)  |
| S2—Ag19—S10                             | 158.0 (2)   | S13—Ag40—S14               | 162.5 (2) |
| O8—Ag19—S2                              | 114.3 (9)   | S13—Ag40—O17               | 109.2 (5) |
| O8—Ag19—S10                             | 85.3 (9)    | S14—Ag40—O17               | 88.0 (5)  |
| O40—Ag19—S2                             | 109.1 (4)   | O17—Ag41—S8                | 124.2 (5) |
| O40—Ag19—S10                            | 82.7 (3)    | O28 <sup>i</sup> —Ag41—S8  | 129.2 (4) |
| O40—Ag19—O8                             | 81.1 (9)    | O28 <sup>i</sup> —Ag41—O17 | 93.0 (6)  |
| O30 <sup>i</sup> —Ag20—O35 <sup>i</sup> | 82.5 (4)    | O36—Ag41—S8                | 130.3 (4) |
| O30 <sup>i</sup> —Ag20—O38              | 81.1 (4)    | O36—Ag41—O17               | 80.6 (6)  |
| O30 <sup>i</sup> —Ag20—O43              | 133.7 (4)   | O36—Ag41—O28 <sup>i</sup>  | 84.5 (5)  |
| O35 <sup>i</sup> —Ag20—O38              | 131.8 (4)   | O39—Ag42—S11               | 133.0 (3) |
| O43—Ag20—O35 <sup>i</sup>               | 80.6 (4)    | O39—Ag42—O40               | 82.6 (5)  |
| O43—Ag20—O38                            | 78.9 (4)    | O40—Ag42—S11               | 133.4 (3) |
| S10—Ag21—S4                             | 156.1 (2)   | S2—Ag43—S11                | 133.2 (2) |
| S10—Ag21—O41                            | 111.3 (3)   | O3—Ag43—S2                 | 124.9 (8) |
| O22—Ag21—S4                             | 87.4 (4)    | O3—Ag43—S11                | 87.9 (8)  |
| O22—Ag21—S10                            | 112.7 (4)   | O3—Ag43—O11                | 88.3 (10) |
| O22—Ag21—O41                            | 78.9 (5)    | O11—Ag43—S2                | 128.6 (5) |
| O41—Ag21—S4                             | 84.4 (3)    | O11—Ag43—S11               | 78.1 (4)  |
| S10—Ag22—S8                             | 125.56 (19) | O31—Ag44—S11               | 133.5 (4) |
| O20—Ag22—S8                             | 78.5 (5)    | O31—Ag44—O32               | 84.6 (5)  |
| O20—Ag22—S10                            | 126.0 (6)   | O32—Ag44—S11               | 129.4 (4) |
| O24—Ag22—S8                             | 86.4 (4)    | O33—Ag45—S3 <sup>i</sup>   | 140.4 (3) |
| O24—Ag22—S10                            | 132.6 (4)   | O33—Ag45—O41 <sup>i</sup>  | 85.1 (5)  |

|                                         |             |                                        |             |
|-----------------------------------------|-------------|----------------------------------------|-------------|
| O24—Ag22—O20                            | 90.8 (7)    | O41 <sup>i</sup> —Ag45—S3 <sup>i</sup> | 132.2 (3)   |
| Symmetry code: (i) $-x+1, -y+1, -z+1$ . |             |                                        |             |
| <b>SD/Ag90b</b>                         |             |                                        |             |
| Ag1—Ag2                                 | 3.033 (3)   | Ag20—S15                               | 2.777 (5)   |
| Ag1—Ag3                                 | 3.109 (2)   | Ag20—O20                               | 2.296 (18)  |
| Ag1—Ag16                                | 3.361 (3)   | Ag20—O24                               | 2.34 (2)    |
| Ag1—Ag27                                | 3.099 (2)   | Ag21—Ag23                              | 3.193 (2)   |
| Ag1—Ag39                                | 3.248 (3)   | Ag21—Ag24                              | 3.0473 (19) |
| Ag1—S2                                  | 2.458 (7)   | Ag21—Ag25                              | 3.1981 (18) |
| Ag1—S3                                  | 2.810 (5)   | Ag21—S15                               | 2.479 (5)   |
| Ag1—O2 <sup>i</sup>                     | 2.38 (2)    | Ag21—O23                               | 2.555 (19)  |
| Ag1—O6 <sup>i</sup>                     | 2.291 (18)  | Ag21—O29                               | 2.354 (12)  |
| Ag2—Ag4                                 | 3.189 (2)   | Ag21—O38 <sup>i</sup>                  | 2.379 (12)  |
| Ag2—Ag27                                | 3.074 (2)   | Ag22—Ag3 <sup>i</sup>                  | 3.085 (2)   |
| Ag2—Ag39                                | 3.072 (3)   | Ag22—Ag4 <sup>i</sup>                  | 3.208 (2)   |
| Ag2—S3                                  | 2.860 (5)   | Ag22—Ag26 <sup>i</sup>                 | 2.8618 (18) |
| Ag2—S4                                  | 2.481 (6)   | Ag22—Ag36                              | 2.981 (2)   |
| Ag2—O2 <sup>i</sup>                     | 2.352 (17)  | Ag22—S3 <sup>i</sup>                   | 2.434 (5)   |
| Ag2—O15                                 | 2.345 (16)  | Ag22—O29                               | 2.285 (12)  |
| Ag3—Ag10 <sup>i</sup>                   | 3.033 (2)   | Ag22—O38 <sup>i</sup>                  | 2.325 (12)  |
| Ag3—Ag22 <sup>i</sup>                   | 3.085 (2)   | Ag23—Ag24                              | 3.0818 (19) |
| Ag3—Ag26                                | 3.1761 (18) | Ag23—Ag37                              | 3.121 (3)   |
| Ag3—Ag27                                | 3.1156 (19) | Ag23—Ag44                              | 3.054 (2)   |
| Ag3—S3                                  | 2.517 (5)   | Ag23—S9                                | 2.469 (5)   |
| Ag3—O5 <sup>i</sup>                     | 2.529 (18)  | Ag23—S15                               | 2.818 (5)   |
| Ag3—O28 <sup>i</sup>                    | 2.350 (12)  | Ag23—O19                               | 2.341 (17)  |
| Ag3—O34                                 | 2.333 (12)  | Ag23—O22                               | 2.369 (18)  |
| Ag4—Ag11 <sup>i</sup>                   | 3.163 (2)   | Ag24—Ag25                              | 2.8607 (17) |
| Ag4—Ag22 <sup>i</sup>                   | 3.208 (2)   | Ag24—Ag37                              | 3.255 (2)   |
| Ag4—Ag26                                | 3.1676 (18) | Ag24—Ag38                              | 3.0925 (19) |
| Ag4—Ag27                                | 3.036 (2)   | Ag24—Ag44                              | 2.9070 (19) |
| Ag4—S3                                  | 2.463 (5)   | Ag24—S15                               | 2.422 (4)   |
| Ag4—O13                                 | 2.448 (14)  | Ag24—O31                               | 2.314 (11)  |
| Ag4—O39                                 | 2.370 (12)  | Ag24—O40                               | 2.339 (13)  |
| Ag4—O41                                 | 2.338 (13)  | Ag25—Ag38                              | 3.1784 (18) |
| Ag5—Ag6                                 | 3.097 (3)   | Ag25—O30                               | 2.405 (11)  |
| Ag5—Ag7                                 | 3.210 (3)   | Ag25—O33                               | 2.417 (11)  |
| Ag5—Ag40                                | 3.344 (3)   | Ag25—O37 <sup>i</sup>                  | 2.385 (11)  |
| Ag5—Ag42                                | 2.951 (2)   | Ag25—O42                               | 2.360 (10)  |
| Ag5—S6                                  | 2.479 (6)   | Ag26—Ag22 <sup>i</sup>                 | 2.8619 (18) |
| Ag5—S11 <sup>i</sup>                    | 2.446 (6)   | Ag26—Ag27                              | 2.8466 (17) |
| Ag5—O13                                 | 2.442 (19)  | Ag26—O30 <sup>i</sup>                  | 2.403 (11)  |
| Ag6—Ag7                                 | 3.080 (2)   | Ag26—O33                               | 2.401 (10)  |

|                       |             |                       |             |
|-----------------------|-------------|-----------------------|-------------|
| Ag6—Ag13 <sup>i</sup> | 3.291 (3)   | Ag26—O37              | 2.390 (10)  |
| Ag6—Ag31              | 3.230 (2)   | Ag26—O42              | 2.438 (11)  |
| Ag6—Ag42              | 2.9419 (19) | Ag27—Ag39             | 2.9012 (19) |
| Ag6—S7                | 2.742 (5)   | Ag27—S3               | 2.438 (5)   |
| Ag6—S11 <sup>i</sup>  | 2.551 (7)   | Ag27—O35              | 2.315 (12)  |
| Ag6—O9                | 2.40 (2)    | Ag27—O43              | 2.308 (13)  |
| Ag6—O12               | 2.37 (2)    | Ag28—Ag37             | 3.356 (3)   |
| Ag7—Ag32              | 3.093 (2)   | Ag28—Ag40             | 3.063 (2)   |
| Ag7—Ag42              | 3.179 (2)   | Ag28—Ag43             | 2.997 (2)   |
| Ag7—S6                | 2.482 (7)   | Ag28—S4               | 2.575 (6)   |
| Ag7—S7                | 2.824 (5)   | Ag28—S5               | 2.462 (6)   |
| Ag7—O12               | 2.32 (2)    | Ag28—O16              | 2.47 (2)    |
| Ag7—O26               | 2.31 (2)    | Ag28—O43              | 2.514 (12)  |
| Ag8—Ag9               | 2.980 (3)   | Ag29—Ag30             | 2.8451 (17) |
| Ag8—Ag30              | 2.9758 (19) | Ag29—Ag31             | 3.1429 (16) |
| Ag8—Ag31              | 3.184 (2)   | Ag29—Ag32             | 3.1806 (17) |
| Ag8—Ag33              | 3.022 (2)   | Ag29—Ag42             | 2.8624 (17) |
| Ag8—S1 <sup>i</sup>   | 2.495 (7)   | Ag29—O30              | 2.419 (11)  |
| Ag8—S7                | 2.723 (5)   | Ag29—O33 <sup>i</sup> | 2.379 (10)  |
| Ag8—O7                | 2.268 (18)  | Ag29—O37              | 2.423 (11)  |
| Ag8—O10               | 2.46 (2)    | Ag29—O42              | 2.388 (10)  |
| Ag9—Ag30              | 2.912 (2)   | Ag30—Ag31             | 3.037 (2)   |
| Ag9—Ag33              | 3.172 (3)   | Ag30—Ag32             | 3.0605 (19) |
| Ag9—S1 <sup>i</sup>   | 2.464 (6)   | Ag30—Ag33             | 3.124 (2)   |
| Ag9—S8                | 2.475 (6)   | Ag30—S7               | 2.466 (5)   |
| Ag9—O5                | 2.32 (2)    | Ag30—O28              | 2.311 (12)  |
| Ag10—Ag3 <sup>i</sup> | 3.033 (2)   | Ag30—O34 <sup>i</sup> | 2.350 (12)  |
| Ag10—Ag11             | 3.153 (3)   | Ag31—Ag42             | 3.036 (2)   |
| Ag10—Ag22             | 3.073 (2)   | Ag31—S7               | 2.474 (5)   |
| Ag10—Ag35             | 3.305 (3)   | Ag31—O8               | 2.501 (17)  |
| Ag10—Ag36             | 3.236 (3)   | Ag31—O32 <sup>i</sup> | 2.351 (12)  |
| Ag10—S3 <sup>i</sup>  | 2.834 (5)   | Ag31—O36              | 2.348 (13)  |
| Ag10—S14              | 2.469 (6)   | Ag32—Ag33             | 3.090 (2)   |
| Ag10—O3               | 2.314 (16)  | Ag32—Ag42             | 3.0668 (19) |
| Ag10—O6               | 2.311 (19)  | Ag32—S7               | 2.516 (4)   |
| Ag11—Ag4 <sup>i</sup> | 3.163 (2)   | Ag32—O27              | 2.58 (2)    |
| Ag11—Ag12             | 3.193 (3)   | Ag32—O31              | 2.345 (11)  |
| Ag11—Ag22             | 2.926 (2)   | Ag32—O40              | 2.336 (12)  |
| Ag11—Ag36             | 3.098 (3)   | Ag33—Ag34             | 3.360 (2)   |
| Ag11—S3 <sup>i</sup>  | 2.758 (5)   | Ag33—S7               | 2.803 (5)   |
| Ag11—S10              | 2.554 (8)   | Ag33—S8               | 2.454 (7)   |
| Ag11—O3               | 2.316 (19)  | Ag33—O10              | 2.41 (2)    |
| Ag11—O14 <sup>i</sup> | 2.373 (18)  | Ag33—O26              | 2.26 (3)    |

|                       |             |           |            |
|-----------------------|-------------|-----------|------------|
| Ag12—Ag13             | 3.081 (3)   | Ag34—Ag35 | 3.044 (2)  |
| Ag12—Ag45             | 3.040 (2)   | Ag34—Ag41 | 3.036 (2)  |
| Ag12—S10              | 2.571 (7)   | Ag34—S8   | 2.496 (6)  |
| Ag12—S11              | 2.521 (7)   | Ag34—S9   | 2.587 (5)  |
| Ag12—O14 <sup>i</sup> | 2.390 (19)  | Ag34—O25  | 2.33 (2)   |
| Ag12—O39 <sup>i</sup> | 2.511 (11)  | Ag34—O31  | 2.517 (11) |
| Ag13—Ag6 <sup>i</sup> | 3.291 (3)   | Ag35—Ag41 | 3.016 (2)  |
| Ag13—Ag45             | 3.094 (3)   | Ag35—S8   | 2.586 (7)  |
| Ag13—S11              | 2.530 (7)   | Ag35—S14  | 2.506 (7)  |
| Ag13—S13              | 2.492 (7)   | Ag35—O5   | 2.50 (2)   |
| Ag13—O9 <sup>i</sup>  | 2.51 (2)    | Ag35—O28  | 2.479 (11) |
| Ag13—O36 <sup>i</sup> | 2.506 (11)  | Ag36—S10  | 2.444 (7)  |
| Ag14—Ag18             | 3.151 (3)   | Ag36—S14  | 2.487 (7)  |
| Ag14—Ag19             | 2.9438 (18) | Ag36—O23  | 2.40 (2)   |
| Ag14—Ag20             | 3.064 (3)   | Ag37—Ag38 | 3.092 (2)  |
| Ag14—S12              | 2.444 (8)   | Ag37—S5   | 2.448 (7)  |
| Ag14—S13              | 2.420 (8)   | Ag37—S15  | 2.810 (5)  |
| Ag14—O8 <sup>i</sup>  | 2.42 (2)    | Ag37—O18  | 2.30 (2)   |
| Ag15—Ag16             | 3.054 (3)   | Ag37—O19  | 2.340 (17) |
| Ag15—Ag17             | 3.063 (3)   | Ag38—S15  | 2.504 (5)  |
| Ag15—S1               | 2.446 (6)   | Ag38—O16  | 2.58 (2)   |
| Ag15—S12              | 2.499 (6)   | Ag38—O35  | 2.366 (12) |
| Ag15—O8 <sup>i</sup>  | 2.48 (2)    | Ag38—O43  | 2.346 (12) |
| Ag15—O32              | 2.466 (12)  | Ag39—S2   | 2.440 (7)  |
| Ag16—Ag17             | 3.021 (2)   | Ag39—S4   | 2.498 (7)  |
| Ag16—S1               | 2.560 (7)   | Ag39—O16  | 2.37 (2)   |
| Ag16—S2               | 2.510 (7)   | Ag40—Ag43 | 2.987 (2)  |
| Ag16—O4 <sup>i</sup>  | 2.34 (2)    | Ag40—S4   | 2.429 (7)  |
| Ag16—O34              | 2.529 (12)  | Ag40—S6   | 2.507 (7)  |
| Ag17—S2               | 2.552 (8)   | Ag40—O13  | 2.482 (17) |
| Ag17—S12              | 2.528 (8)   | Ag40—O41  | 2.489 (13) |
| Ag17—O17              | 2.325 (19)  | Ag41—S9   | 2.446 (6)  |
| Ag17—O35              | 2.501 (11)  | Ag41—S14  | 2.522 (6)  |
| Ag18—Ag19             | 2.995 (2)   | Ag41—O23  | 2.49 (2)   |
| Ag18—Ag20             | 3.027 (3)   | Ag41—O29  | 2.490 (11) |
| Ag18—Ag38             | 3.071 (2)   | Ag42—S7   | 2.432 (5)  |
| Ag18—S12              | 2.458 (7)   | Ag42—O39  | 2.332 (12) |
| Ag18—S15              | 2.791 (5)   | Ag42—O41  | 2.285 (13) |
| Ag18—O18              | 2.30 (2)    | Ag43—S5   | 2.615 (7)  |
| Ag18—O20              | 2.365 (17)  | Ag43—S6   | 2.522 (6)  |
| Ag19—Ag20             | 2.925 (2)   | Ag43—O27  | 2.53 (3)   |
| Ag19—Ag21             | 3.139 (2)   | Ag43—O40  | 2.460 (12) |
| Ag19—Ag25             | 2.8365 (16) | Ag44—S5   | 2.510 (7)  |

|                                       |             |                            |             |
|---------------------------------------|-------------|----------------------------|-------------|
| Ag19—Ag38                             | 3.090 (2)   | Ag44—S9                    | 2.483 (6)   |
| Ag19—S15                              | 2.434 (5)   | Ag44—O27                   | 2.46 (3)    |
| Ag19—O32                              | 2.312 (12)  | Ag45—S10                   | 2.482 (8)   |
| Ag19—O36 <sup>i</sup>                 | 2.337 (12)  | Ag45—S13                   | 2.526 (8)   |
| Ag20—Ag21                             | 3.159 (2)   | Ag45—O24                   | 2.36 (2)    |
| Ag20—Ag45                             | 3.287 (3)   | Ag45—O38 <sup>i</sup>      | 2.533 (11)  |
| Ag20—S13                              | 2.552 (7)   |                            |             |
| S2—Ag1—S3                             | 129.95 (18) | S9—Ag23—S15                | 128.73 (14) |
| O2 <sup>i</sup> —Ag1—S2               | 131.3 (5)   | O19—Ag23—S9                | 140.9 (5)   |
| O2 <sup>i</sup> —Ag1—S3               | 78.2 (5)    | O19—Ag23—S15               | 78.6 (4)    |
| O6 <sup>i</sup> —Ag1—S2               | 127.4 (5)   | O19—Ag23—O22               | 88.2 (7)    |
| O6 <sup>i</sup> —Ag1—S3               | 86.8 (5)    | O22—Ag23—S9                | 106.1 (5)   |
| O6 <sup>i</sup> —Ag1—O2 <sup>i</sup>  | 86.3 (6)    | O22—Ag23—S15               | 105.8 (5)   |
| S4—Ag2—S3                             | 128.64 (17) | O31—Ag24—S15               | 138.0 (3)   |
| O2 <sup>i</sup> —Ag2—S3               | 77.6 (4)    | O31—Ag24—O40               | 83.2 (4)    |
| O2 <sup>i</sup> —Ag2—S4               | 142.4 (5)   | O40—Ag24—S15               | 136.3 (3)   |
| O15—Ag2—S3                            | 104.4 (4)   | O30—Ag25—O33               | 132.1 (3)   |
| O15—Ag2—S4                            | 107.3 (4)   | O37 <sup>i</sup> —Ag25—O30 | 80.2 (4)    |
| O15—Ag2—O2 <sup>i</sup>               | 86.9 (7)    | O37 <sup>i</sup> —Ag25—O33 | 81.3 (4)    |
| S3—Ag3—O5 <sup>i</sup>                | 128.0 (5)   | O42—Ag25—O30               | 80.7 (4)    |
| O28 <sup>i</sup> —Ag3—S3              | 131.2 (3)   | O42—Ag25—O33               | 80.0 (4)    |
| O28 <sup>i</sup> —Ag3—O5 <sup>i</sup> | 77.1 (5)    | O42—Ag25—O37 <sup>i</sup>  | 132.3 (3)   |
| O34—Ag3—S3                            | 129.9 (3)   | O30 <sup>i</sup> —Ag26—O42 | 130.9 (4)   |
| O34—Ag3—O5 <sup>i</sup>               | 89.2 (6)    | O33—Ag26—O30 <sup>i</sup>  | 80.5 (3)    |
| O34—Ag3—O28 <sup>i</sup>              | 83.8 (4)    | O33—Ag26—O42               | 78.8 (4)    |
| O13—Ag4—S3                            | 123.0 (4)   | O37—Ag26—O30 <sup>i</sup>  | 80.2 (4)    |
| O39—Ag4—S3                            | 126.9 (3)   | O37—Ag26—O33               | 131.5 (4)   |
| O39—Ag4—O13                           | 96.0 (5)    | O37—Ag26—O42               | 81.3 (4)    |
| O41—Ag4—S3                            | 134.4 (3)   | O35—Ag27—S3                | 136.9 (3)   |
| O41—Ag4—O13                           | 79.8 (5)    | O43—Ag27—S3                | 136.3 (3)   |
| O41—Ag4—O39                           | 82.3 (4)    | O43—Ag27—O35               | 84.2 (4)    |
| S11 <sup>i</sup> —Ag5—S6              | 160.0 (3)   | S5—Ag28—S4                 | 157.7 (2)   |
| O13—Ag5—S6                            | 94.4 (4)    | S5—Ag28—O16                | 112.6 (5)   |
| O13—Ag5—S11 <sup>i</sup>              | 105.4 (4)   | S5—Ag28—O43                | 113.0 (3)   |
| S11 <sup>i</sup> —Ag6—S7              | 132.91 (16) | O16—Ag28—S4                | 86.9 (5)    |
| O9—Ag6—S7                             | 113.0 (5)   | O16—Ag28—O43               | 79.5 (5)    |
| O9—Ag6—S11 <sup>i</sup>               | 86.1 (5)    | O43—Ag28—S4                | 80.0 (3)    |
| O12—Ag6—S7                            | 79.2 (5)    | O30—Ag29—O37               | 133.6 (4)   |
| O12—Ag6—S11 <sup>i</sup>              | 132.1 (6)   | O33 <sup>i</sup> —Ag29—O30 | 80.6 (4)    |
| O12—Ag6—O9                            | 116.2 (7)   | O33 <sup>i</sup> —Ag29—O37 | 81.3 (4)    |
| S6—Ag7—S7                             | 131.93 (17) | O33 <sup>i</sup> —Ag29—O42 | 132.4 (4)   |
| O12—Ag7—S6                            | 128.7 (6)   | O42—Ag29—O30               | 79.9 (4)    |
| O12—Ag7—S7                            | 78.4 (6)    | O42—Ag29—O37               | 81.6 (4)    |



|                                         |             |                           |             |
|-----------------------------------------|-------------|---------------------------|-------------|
| O26—Ag7—S6                              | 123.0 (7)   | O28—Ag30—S7               | 137.1 (3)   |
| O26—Ag7—S7                              | 83.0 (6)    | O28—Ag30—O34 <sup>i</sup> | 84.3 (4)    |
| O26—Ag7—O12                             | 97.2 (9)    | O34 <sup>i</sup> —Ag30—S7 | 137.4 (3)   |
| S1 <sup>i</sup> —Ag8—S7                 | 134.48 (17) | S7—Ag31—O8                | 119.0 (5)   |
| O7—Ag8—S1 <sup>i</sup>                  | 107.1 (6)   | O32 <sup>i</sup> —Ag31—S7 | 133.2 (3)   |
| O7—Ag8—S7                               | 102.9 (6)   | O32 <sup>i</sup> —Ag31—O8 | 79.4 (5)    |
| O7—Ag8—O10                              | 84.8 (7)    | O36—Ag31—S7               | 131.3 (3)   |
| O10—Ag8—S1 <sup>i</sup>                 | 136.4 (6)   | O36—Ag31—O8               | 94.3 (6)    |
| O10—Ag8—S7                              | 79.0 (6)    | O36—Ag31—O32 <sup>i</sup> | 84.0 (4)    |
| S1 <sup>i</sup> —Ag9—S8                 | 160.5 (2)   | S7—Ag32—O27               | 123.3 (6)   |
| O5—Ag9—S1 <sup>i</sup>                  | 107.1 (6)   | O31—Ag32—S7               | 132.8 (3)   |
| O5—Ag9—S8                               | 92.2 (6)    | O31—Ag32—O27              | 89.1 (6)    |
| S14—Ag10—S3 <sup>i</sup>                | 133.68 (18) | O40—Ag32—S7               | 133.0 (3)   |
| O3—Ag10—S3 <sup>i</sup>                 | 76.3 (5)    | O40—Ag32—O27              | 78.0 (7)    |
| O3—Ag10—S14                             | 125.7 (6)   | O40—Ag32—O31              | 82.6 (4)    |
| O6—Ag10—S3 <sup>i</sup>                 | 85.8 (4)    | S8—Ag33—S7                | 132.91 (18) |
| O6—Ag10—S14                             | 129.0 (5)   | O10—Ag33—S7               | 78.3 (5)    |
| O6—Ag10—O3                              | 89.0 (7)    | O10—Ag33—S8               | 129.6 (6)   |
| S10—Ag11—S3 <sup>i</sup>                | 136.58 (18) | O26—Ag33—S7               | 84.3 (5)    |
| O3—Ag11—S3 <sup>i</sup>                 | 77.8 (5)    | O26—Ag33—S8               | 123.2 (6)   |
| O3—Ag11—S10                             | 128.6 (5)   | O26—Ag33—O10              | 93.4 (9)    |
| O3—Ag11—O14 <sup>i</sup>                | 117.4 (6)   | S8—Ag34—S9                | 158.2 (2)   |
| O14 <sup>i</sup> —Ag11—S3 <sup>i</sup>  | 114.9 (4)   | S8—Ag34—O31               | 111.1 (3)   |
| O14 <sup>i</sup> —Ag11—S10              | 85.1 (5)    | O25—Ag34—S8               | 97.7 (7)    |
| S11—Ag12—S10                            | 157.3 (2)   | O25—Ag34—S9               | 92.8 (7)    |
| O14 <sup>i</sup> —Ag12—S10              | 84.4 (5)    | O25—Ag34—O31              | 115.1 (6)   |
| O14 <sup>i</sup> —Ag12—S11              | 110.0 (5)   | O31—Ag34—S9               | 81.1 (3)    |
| O14 <sup>i</sup> —Ag12—O39 <sup>i</sup> | 109.2 (5)   | S14—Ag35—S8               | 155.59 (19) |
| O39 <sup>i</sup> —Ag12—S10              | 113.2 (3)   | S14—Ag35—O5               | 115.6 (5)   |
| O39 <sup>i</sup> —Ag12—S11              | 79.4 (3)    | O5—Ag35—S8                | 85.6 (5)    |
| S13—Ag13—S11                            | 157.4 (2)   | O28—Ag35—S8               | 83.0 (3)    |
| S13—Ag13—O9 <sup>i</sup>                | 111.4 (5)   | O28—Ag35—S14              | 112.9 (3)   |
| S13—Ag13—O36 <sup>i</sup>               | 79.7 (3)    | O28—Ag35—O5               | 75.4 (5)    |
| O9 <sup>i</sup> —Ag13—S11               | 84.2 (5)    | S10—Ag36—S14              | 160.6 (2)   |
| O36 <sup>i</sup> —Ag13—S11              | 111.5 (3)   | O23—Ag36—S10              | 106.6 (5)   |
| O36 <sup>i</sup> —Ag13—O9 <sup>i</sup>  | 109.0 (5)   | O23—Ag36—S14              | 92.6 (5)    |
| S13—Ag14—S12                            | 160.9 (2)   | S5—Ag37—S15               | 124.89 (17) |
| O8 <sup>i</sup> —Ag14—S12               | 90.6 (6)    | O18—Ag37—S5               | 130.1 (6)   |
| O8 <sup>i</sup> —Ag14—S13               | 108.4 (6)   | O18—Ag37—S15              | 87.2 (5)    |
| S1—Ag15—S12                             | 157.5 (2)   | O18—Ag37—O19              | 91.1 (7)    |
| S1—Ag15—O8 <sup>i</sup>                 | 111.2 (5)   | O19—Ag37—S5               | 128.6 (5)   |
| S1—Ag15—O32                             | 113.1 (3)   | O19—Ag37—S15              | 78.8 (4)    |
| O8 <sup>i</sup> —Ag15—S12               | 88.0 (5)    | S15—Ag38—O16              | 124.7 (4)   |

|                                        |             |                           |           |
|----------------------------------------|-------------|---------------------------|-----------|
| O32—Ag15—S12                           | 81.6 (3)    | O35—Ag38—S15              | 131.0 (3) |
| O32—Ag15—O8 <sup>i</sup>               | 77.8 (5)    | O35—Ag38—O16              | 90.4 (5)  |
| S2—Ag16—S1                             | 159.8 (2)   | O43—Ag38—S15              | 131.6 (3) |
| S2—Ag16—O34                            | 109.1 (3)   | O43—Ag38—O16              | 80.4 (6)  |
| O4 <sup>i</sup> —Ag16—S1               | 95.2 (5)    | O43—Ag38—O35              | 82.3 (4)  |
| O4 <sup>i</sup> —Ag16—S2               | 95.1 (5)    | S2—Ag39—S4                | 156.7 (2) |
| O4 <sup>i</sup> —Ag16—O34              | 119.2 (6)   | O16—Ag39—S2               | 112.0 (6) |
| O34—Ag16—S1                            | 80.7 (3)    | O16—Ag39—S4               | 90.9 (6)  |
| S12—Ag17—S2                            | 159.7 (2)   | S4—Ag40—S6                | 157.4 (2) |
| O17—Ag17—S2                            | 96.2 (6)    | S4—Ag40—O13               | 105.9 (5) |
| O17—Ag17—S12                           | 93.8 (6)    | S4—Ag40—O41               | 111.6 (3) |
| O17—Ag17—O35                           | 120.1 (6)   | O13—Ag40—S6               | 92.7 (5)  |
| O35—Ag17—S2                            | 81.9 (3)    | O13—Ag40—O41              | 76.3 (4)  |
| O35—Ag17—S12                           | 108.0 (3)   | O41—Ag40—S6               | 84.8 (3)  |
| S12—Ag18—S15                           | 134.70 (16) | S9—Ag41—S14               | 160.1 (2) |
| O18—Ag18—S12                           | 123.9 (5)   | S9—Ag41—O23               | 107.5 (5) |
| O18—Ag18—S15                           | 87.6 (5)    | S9—Ag41—O29               | 108.9 (3) |
| O18—Ag18—O20                           | 90.1 (7)    | O23—Ag41—S14              | 89.7 (5)  |
| O20—Ag18—S12                           | 126.4 (5)   | O29—Ag41—S14              | 84.3 (3)  |
| O20—Ag18—S15                           | 79.3 (4)    | O29—Ag41—O23              | 77.6 (5)  |
| O32—Ag19—S15                           | 137.0 (3)   | O39—Ag42—S7               | 138.5 (3) |
| O32—Ag19—O36 <sup>i</sup>              | 85.1 (4)    | O41—Ag42—S7               | 135.9 (3) |
| O36 <sup>i</sup> —Ag19—S15             | 136.5 (4)   | O41—Ag42—O39              | 84.3 (4)  |
| S13—Ag20—S15                           | 135.76 (16) | S6—Ag43—S5                | 158.3 (2) |
| O20—Ag20—S13                           | 128.7 (5)   | O27—Ag43—S5               | 90.1 (6)  |
| O20—Ag20—S15                           | 80.7 (5)    | O27—Ag43—S6               | 109.3 (6) |
| O20—Ag20—O24                           | 118.0 (6)   | O40—Ag43—S5               | 83.9 (3)  |
| O24—Ag20—S13                           | 82.6 (6)    | O40—Ag43—S6               | 109.4 (3) |
| O24—Ag20—S15                           | 114.8 (5)   | O40—Ag43—O27              | 76.7 (6)  |
| S15—Ag21—O23                           | 123.7 (5)   | S9—Ag44—S5                | 154.9 (2) |
| O29—Ag21—S15                           | 132.2 (3)   | O27—Ag44—S5               | 94.1 (7)  |
| O29—Ag21—O23                           | 78.9 (5)    | O27—Ag44—S9               | 110.0 (7) |
| O29—Ag21—O38 <sup>i</sup>              | 84.0 (4)    | S10—Ag45—S13              | 158.4 (2) |
| O38 <sup>i</sup> —Ag21—S15             | 128.5 (4)   | S10—Ag45—O38 <sup>i</sup> | 82.0 (3)  |
| O38 <sup>i</sup> —Ag21—O23             | 94.3 (5)    | S13—Ag45—O38 <sup>i</sup> | 110.3 (3) |
| O29—Ag22—S3 <sup>i</sup>               | 137.4 (3)   | O24—Ag45—10               | 111.4 (6) |
| O29—Ag22—O38 <sup>i</sup>              | 86.8 (4)    | O24—Ag45—S13              | 82.8 (6)  |
| O38 <sup>i</sup> —Ag22—S3 <sup>i</sup> | 133.6 (3)   | O24—Ag45—O38 <sup>i</sup> | 106.8 (6) |
| Symmetry code: (i) $-x+1, -y+1, -z$ .  |             |                           |           |

**Supplementary Table 3:** The Ag-Ag edge lengths in Ag<sub>60</sub>, Ag<sub>24</sub> and Ag<sub>6</sub> shells of SD/Ag<sub>90a</sub>

| Ag-Ag edge lengths in Ag <sub>60</sub> shell of SD/Ag <sub>90a</sub> (Å) |      |                                     |      |                                      |      |
|--------------------------------------------------------------------------|------|-------------------------------------|------|--------------------------------------|------|
| Ag1—Ag2                                                                  | 3.06 | Ag22—Ag28                           | 3.37 | Ag8 <sup>i</sup> —Ag9 <sup>i</sup>   | 3.12 |
| Ag1—Ag6                                                                  | 3.99 | Ag23—Ag25                           | 3.22 | Ag8 <sup>i</sup> —Ag10 <sup>i</sup>  | 3.10 |
| Ag1—Ag24 <sup>i</sup>                                                    | 3.29 | Ag23—Ag26                           | 3.88 | Ag9 <sup>i</sup> —Ag10 <sup>i</sup>  | 3.06 |
| Ag1—Ag40 <sup>i</sup>                                                    | 3.04 | Ag24—Ag1 <sup>i</sup>               | 3.29 | Ag9 <sup>i</sup> —Ag12 <sup>i</sup>  | 3.65 |
| Ag2—Ag38 <sup>i</sup>                                                    | 3.37 | Ag24—Ag31 <sup>i</sup>              | 3.04 | Ag10 <sup>i</sup> —Ag11 <sup>i</sup> | 3.44 |
| Ag2—Ag40 <sup>i</sup>                                                    | 3.12 | Ag24—Ag15 <sup>i</sup>              | 3.66 | Ag11 <sup>i</sup> —Ag12 <sup>i</sup> | 3.11 |
| Ag2—Ag5                                                                  | 3.83 | Ag24—Ag25                           | 3.05 | Ag11 <sup>i</sup> —Ag23 <sup>i</sup> | 3.07 |
| Ag5—Ag6                                                                  | 3.08 | Ag25—Ag40                           | 3.55 | Ag11 <sup>i</sup> —Ag22 <sup>i</sup> | 3.67 |
| Ag5—Ag7                                                                  | 3.19 | Ag25—Ag31 <sup>i</sup>              | 3.14 | Ag12 <sup>i</sup> —Ag23 <sup>i</sup> | 3.11 |
| Ag5—Ag8                                                                  | 3.30 | Ag26—Ag28                           | 3.04 | Ag14 <sup>i</sup> —Ag19 <sup>i</sup> | 3.03 |
| Ag6—Ag7                                                                  | 3.03 | Ag26—Ag39                           | 3.43 | Ag14 <sup>i</sup> —Ag15 <sup>i</sup> | 3.59 |
| Ag6—Ag14                                                                 | 3.36 | Ag28—Ag37                           | 3.57 | Ag14 <sup>i</sup> —Ag21 <sup>i</sup> | 3.09 |
| Ag7—Ag10                                                                 | 3.57 | Ag31—Ag25 <sup>i</sup>              | 3.14 | Ag15 <sup>i</sup> —Ag43 <sup>i</sup> | 3.14 |
| Ag7—Ag21                                                                 | 3.49 | Ag31—Ag24 <sup>i</sup>              | 3.04 | Ag15 <sup>i</sup> —Ag17 <sup>i</sup> | 3.02 |
| Ag8—Ag9                                                                  | 3.12 | Ag31—Ag12 <sup>i</sup>              | 3.48 | Ag17 <sup>i</sup> —Ag43 <sup>i</sup> | 3.07 |
| Ag8—Ag10                                                                 | 3.09 | Ag32—Ag33                           | 2.96 | Ag17 <sup>i</sup> —Ag31 <sup>i</sup> | 3.36 |
| Ag8—Ag33 <sup>i</sup>                                                    | 3.56 | Ag32—Ag34                           | 3.03 | Ag17 <sup>i</sup> —Ag32 <sup>i</sup> | 4.03 |
| Ag9—Ag12                                                                 | 3.65 | Ag32—Ag9 <sup>i</sup>               | 3.41 | Ag19 <sup>i</sup> —Ag21 <sup>i</sup> | 3.06 |
| Ag9—Ag32 <sup>i</sup>                                                    | 3.41 | Ag33—Ag38                           | 3.52 | Ag19 <sup>i</sup> —Ag43 <sup>i</sup> | 3.44 |
| Ag9—Ag10                                                                 | 3.06 | Ag33—Ag8 <sup>i</sup>               | 3.56 | Ag21 <sup>i</sup> —Ag22 <sup>i</sup> | 3.35 |
| Ag10—Ag11                                                                | 3.44 | Ag33—Ag34                           | 3.24 | Ag22 <sup>i</sup> —Ag28 <sup>i</sup> | 3.37 |
| Ag11—Ag12                                                                | 3.11 | Ag34—Ag37                           | 3.30 | Ag22 <sup>i</sup> —Ag26 <sup>i</sup> | 3.12 |
| Ag11—Ag22                                                                | 3.67 | Ag34—Ag43                           | 3.69 | Ag23 <sup>i</sup> —Ag25 <sup>i</sup> | 3.22 |
| Ag11—Ag23                                                                | 3.07 | Ag37—Ag38                           | 3.10 | Ag23 <sup>i</sup> —Ag26 <sup>i</sup> | 3.88 |
| Ag12—Ag23                                                                | 3.11 | Ag37—Ag39                           | 3.08 | Ag24 <sup>i</sup> —Ag25 <sup>i</sup> | 3.06 |
| Ag12—Ag31 <sup>i</sup>                                                   | 3.48 | Ag38—Ag39                           | 3.06 | Ag25 <sup>i</sup> —Ag40 <sup>i</sup> | 3.55 |
| Ag14—Ag15                                                                | 3.59 | Ag38—Ag2 <sup>i</sup>               | 3.37 | Ag26 <sup>i</sup> —Ag28 <sup>i</sup> | 3.05 |
| Ag14—Ag19                                                                | 3.03 | Ag39—Ag40                           | 3.55 | Ag26 <sup>i</sup> —Ag39 <sup>i</sup> | 3.43 |
| Ag14—Ag21                                                                | 3.09 | Ag40—Ag1 <sup>i</sup>               | 3.05 | Ag28 <sup>i</sup> —Ag19 <sup>i</sup> | 3.47 |
| Ag15—Ag17                                                                | 3.02 | Ag40—Ag2 <sup>i</sup>               | 3.12 | Ag28 <sup>i</sup> —Ag37 <sup>i</sup> | 3.57 |
| Ag15—Ag43                                                                | 3.14 | Ag1 <sup>i</sup> —Ag2 <sup>i</sup>  | 3.06 | Ag32 <sup>i</sup> —Ag33 <sup>i</sup> | 2.96 |
| Ag15—Ag24 <sup>i</sup>                                                   | 3.66 | Ag1 <sup>i</sup> —Ag6 <sup>i</sup>  | 3.99 | Ag32 <sup>i</sup> —Ag34 <sup>i</sup> | 3.03 |
| Ag17—Ag31                                                                | 3.36 | Ag2 <sup>i</sup> —Ag5 <sup>i</sup>  | 3.83 | Ag33 <sup>i</sup> —Ag34 <sup>i</sup> | 3.24 |
| Ag17—Ag43                                                                | 3.07 | Ag5 <sup>i</sup> —Ag6 <sup>i</sup>  | 3.08 | Ag33 <sup>i</sup> —Ag38 <sup>i</sup> | 3.52 |
| Ag17—Ag32                                                                | 4.03 | Ag5 <sup>i</sup> —Ag7 <sup>i</sup>  | 3.19 | Ag34 <sup>i</sup> —Ag37 <sup>i</sup> | 3.30 |
| Ag19—Ag43                                                                | 3.44 | Ag5 <sup>i</sup> —Ag8 <sup>i</sup>  | 3.30 | Ag34 <sup>i</sup> —Ag43 <sup>i</sup> | 3.69 |
| Ag19—Ag28                                                                | 3.47 | Ag6 <sup>i</sup> —Ag7 <sup>i</sup>  | 3.03 | Ag37 <sup>i</sup> —Ag39 <sup>i</sup> | 3.08 |
| Ag19—Ag21                                                                | 3.06 | Ag6 <sup>i</sup> —Ag14 <sup>i</sup> | 3.37 | Ag37 <sup>i</sup> —Ag38 <sup>i</sup> | 3.10 |
| Ag21—Ag22                                                                | 3.35 | Ag7 <sup>i</sup> —Ag10 <sup>i</sup> | 3.57 | Ag38 <sup>i</sup> —Ag39 <sup>i</sup> | 3.06 |
| Ag22—Ag26                                                                | 3.12 | Ag7 <sup>i</sup> —Ag21 <sup>i</sup> | 3.49 | Ag39 <sup>i</sup> —Ag40 <sup>i</sup> | 3.55 |

| <b>Ag-Ag edge lengths in Ag<sub>24</sub> shell of SD/Ag90a (Å)</b> |      |                                      |      |                                      |      |
|--------------------------------------------------------------------|------|--------------------------------------|------|--------------------------------------|------|
| Ag3—Ag4                                                            | 3.09 | Ag36 <sup>i</sup> —Ag45 <sup>i</sup> | 3.02 | Ag36—Ag35                            | 3.47 |
| Ag3—Ag36 <sup>i</sup>                                              | 3.14 | Ag36 <sup>i</sup> —Ag35 <sup>i</sup> | 3.47 | Ag35 <sup>i</sup> —Ag44 <sup>i</sup> | 3.14 |
| Ag4—Ag45 <sup>i</sup>                                              | 3.19 | Ag45 <sup>i</sup> —Ag13              | 3.46 | Ag35 <sup>i</sup> —Ag42 <sup>i</sup> | 3.06 |
| Ag13—Ag16 <sup>i</sup>                                             | 3.09 | Ag16 <sup>i</sup> —Ag44 <sup>i</sup> | 3.43 | Ag44 <sup>i</sup> —Ag18 <sup>i</sup> | 3.05 |
| Ag13—Ag27                                                          | 3.08 | Ag27—Ag42                            | 3.48 | Ag27 <sup>i</sup> —Ag42 <sup>i</sup> | 3.48 |
| Ag16—Ag13 <sup>i</sup>                                             | 3.09 | Ag16—Ag44                            | 3.43 | Ag18 <sup>i</sup> —Ag42 <sup>i</sup> | 3.09 |
| Ag16—Ag41 <sup>i</sup>                                             | 3.17 | Ag13 <sup>i</sup> —Ag45              | 3.46 | Ag3 <sup>i</sup> —Ag36               | 3.14 |
| Ag18—Ag42                                                          | 3.09 | Ag13 <sup>i</sup> —Ag27 <sup>i</sup> | 3.08 | Ag36—Ag45                            | 3.02 |
| Ag18—Ag44                                                          | 3.05 | Ag41 <sup>i</sup> —Ag27 <sup>i</sup> | 3.12 | Ag16 <sup>i</sup> —Ag41              | 3.17 |
| Ag27—Ag41                                                          | 3.12 | Ag41—Ag3 <sup>i</sup>                | 3.44 | Ag4 <sup>i</sup> —Ag45               | 3.19 |
| Ag42—Ag35                                                          | 3.06 | Ag3 <sup>i</sup> —Ag4 <sup>i</sup>   | 3.09 | Ag3—Ag41 <sup>i</sup>                | 3.44 |
| Ag44—Ag35                                                          | 3.14 | Ag4 <sup>i</sup> —Ag18 <sup>i</sup>  | 3.43 | Ag4—Ag18                             | 3.43 |
| <b>Ag-Ag edge lengths in Ag<sub>6</sub> shell of SD/Ag90a (Å)</b>  |      |                                      |      |                                      |      |
| Ag20—Ag29                                                          | 3.58 | Ag29—Ag30 <sup>i</sup>               | 3.56 | Ag30—Ag20 <sup>i</sup>               | 3.51 |
| Ag20—Ag30 <sup>i</sup>                                             | 3.51 | Ag29—Ag30                            | 3.61 | Ag20 <sup>i</sup> —Ag30 <sup>i</sup> | 3.61 |
| Ag20—Ag29 <sup>i</sup>                                             | 3.60 | Ag29—Ag20 <sup>i</sup>               | 3.60 | Ag29 <sup>i</sup> —Ag20 <sup>i</sup> | 3.58 |
| Ag29—Ag30                                                          | 3.59 | Ag30—Ag29 <sup>i</sup>               | 3.56 | Ag29 <sup>i</sup> —Ag30 <sup>i</sup> | 3.59 |
| Symmetry code: (i) $-x+1, -y+1, -z+1$ .                            |      |                                      |      |                                      |      |

**Supplementary Table 4:** Axis alignment of icosahedral, octahedral and tetrahedral shells

| Arrangement     | Polyhedron             | Vertices | Shell symmetry order | Shell point group | Type (n-fold) and number of axes of rotational symmetry |    |          |          | Nest symmetry order | Nest point group      |
|-----------------|------------------------|----------|----------------------|-------------------|---------------------------------------------------------|----|----------|----------|---------------------|-----------------------|
|                 |                        |          |                      |                   | 5-                                                      | 4- | 3-       | 2-       |                     |                       |
|                 | Dodecahedron           | 555      | 120                  | I <sub>h</sub>    | 6                                                       |    | 10       | 15       |                     |                       |
|                 | Icosahedron            | 33333    | 120                  | I <sub>h</sub>    | 6                                                       |    | 10       | 15       |                     |                       |
|                 | Cube                   | 444      | 48                   | O <sub>h</sub>    |                                                         | 3  | 4        | 6        |                     |                       |
|                 | Octahedron             | 3333     | 48                   | O <sub>h</sub>    |                                                         | 3  | 4        | 6        |                     |                       |
|                 | Tetrahedron            | 333      | 24                   | T <sub>h</sub>    |                                                         |    | 4        | 3        |                     |                       |
|                 |                        |          |                      |                   |                                                         |    |          |          |                     |                       |
| Kepler's Kosmos | Dodecahedron           | 555      | 120                  | I <sub>h</sub>    |                                                         |    | 4        | 3        |                     |                       |
|                 | Icosahedron            | 33333    | 120                  | I <sub>h</sub>    |                                                         |    | 4        | 3        |                     |                       |
|                 | Cube                   | 444      | 48                   | O <sub>h</sub>    |                                                         | 3  | 4        |          |                     |                       |
|                 | Octahedron             | 3333     | 48                   | O <sub>h</sub>    |                                                         | 3  | 4        |          |                     |                       |
|                 | Tetrahedron            | 333      | 24                   | T <sub>d</sub>    |                                                         |    | 4        | 3        |                     |                       |
|                 | Quintuple nest         |          |                      |                   |                                                         |    | <b>4</b> | <b>3</b> | <b>24</b>           | <b>T<sub>d</sub></b>  |
|                 |                        |          |                      |                   |                                                         |    |          |          |                     |                       |
| Kepler's Kosmos | Dodecahedron           | 555      | 120                  | I <sub>h</sub>    |                                                         |    | 4        | 3        |                     |                       |
|                 | Cube                   | 444      | 48                   | O <sub>h</sub>    |                                                         | 3  | 4        |          |                     |                       |
|                 | Double nest            |          |                      |                   |                                                         |    | <b>4</b> | <b>3</b> | <b>24</b>           | <b>T<sub>h</sub></b>  |
|                 |                        |          |                      |                   |                                                         |    |          |          |                     |                       |
| Alternative     | Dodecahedron           | 555      | 120                  | I <sub>h</sub>    |                                                         |    | 4        | 3        |                     |                       |
|                 | Icosahedron            | 33333    | 120                  | I <sub>h</sub>    |                                                         |    | 4        | 3        |                     |                       |
|                 | Cube, 45°              | 444      | 48                   | O <sub>h</sub>    |                                                         | 3  | 4        |          |                     |                       |
|                 | Octahedron, 45°        | 3333     | 48                   | O <sub>h</sub>    |                                                         | 3  | 4        |          |                     |                       |
|                 | Tetrahedron            | 333      | 24                   | T <sub>d</sub>    |                                                         |    | 4        | 3        |                     |                       |
|                 | Quintuple nest         |          |                      |                   |                                                         |    |          | <b>3</b> | <b>4</b>            | <b>D<sub>2</sub></b>  |
|                 |                        |          |                      |                   |                                                         |    |          |          |                     |                       |
| Alternative     | Dodecahedron           | 555      | 120                  | I <sub>h</sub>    |                                                         |    | 4        | 3        |                     |                       |
|                 | Cube, 45°              | 444      | 48                   | O <sub>h</sub>    |                                                         | 3  | 4        |          |                     |                       |
|                 | Double nest            |          |                      |                   |                                                         |    |          | <b>3</b> | <b>8</b>            | <b>D<sub>2h</sub></b> |
|                 |                        |          |                      |                   |                                                         |    |          |          |                     |                       |
| <b>SD/Ag90a</b> | Rhombicosidodecahedron | 3454     | 120                  | I <sub>h</sub>    |                                                         |    | 4        | 3        |                     |                       |
|                 | Truncated octahedron   | 466      | 48                   | O <sub>h</sub>    |                                                         | 3  | 4        |          |                     |                       |
|                 | Octahedron             | 3333     | 48                   | O <sub>h</sub>    |                                                         | 3  | 4        |          |                     |                       |
|                 | Triple nest            |          |                      |                   |                                                         |    | <b>4</b> | <b>3</b> | <b>24</b>           | <b>T<sub>h</sub></b>  |

### Supplementary References

- 1) Li, G., Lei, Z. & Wang, Q.-M. Luminescent molecular Ag-S nanocluster  $[\text{Ag}_{62}\text{S}_{13}(\text{SBU}^{\ominus})_{32}](\text{BF}_4)_4$ . *J. Am. Chem. Soc.* **132**, 17678-17679, (2010).
- 2) Rigaku Oxford Diffraction. *CrysAlis<sup>Pro</sup> Software system, version 1.171.40.25a*, Rigaku Corporation: Oxford, UK, (2018).
- 3) Palatinus, L. & Chapuis, G. SUPERFLIP - a computer program for the solution of crystal structures by charge flipping in arbitrary dimensions. *J. Appl. Crystallogr.* **40**, 786-790 (2007).
- 4) Sheldrick, G.M. Crystal structure refinement with SHELXL. *Acta Crystallogr., Sect. C: Struct. Chem.* **71**, 3-8 (2015).
- 5) Dolomanov, O.V., Bourhis, L.J., Gildea, R.J., Howard, J.A.K. & Puschmann, H. OLEX2: a complete structure solution, refinement and analysis program. *J. Appl. Crystallogr.* **42**, 339-341 (2009).
- 6) Spek, A.L. Structure validation in chemical crystallography. *Acta Crystallogr D* **65**, 148-155 (2009).
- 7) Voss, N.R. & Gerstein, M. 3V: cavity, channel and cleft volume calculator and extractor. *Nucleic Acids Res* **38**, W555-W562 (2010).
