# Supplementary material for: A Keplerian Ag90 nest of Platonic and Archimedean polyhedra in different symmetry groups
Source: PubMed Central journal article supplement (PMC7335041; doi:10.1038/s41467-020-17198-1), 2020-07-03
Supplement: 41467_2020_17198_MOESM3_ESM.pdf [file 41467_2020_17198_MOESM3_ESM.pdf]

## **Description of Additional Supplementary Files**

File Name: Supplementary Movie 1

Description: Switching between Kepler's Kosmos and the Alternative alignment, showing the cube and the octahedron in the latter at  $45^\circ$  to their positions in the former. The viewer may stop the action at any point and switch between structures.
